# Supplementary material for: Trial of healthy relationship initiatives for the very early years (THRIVE), evaluating Enhanced Triple P for Baby and Mellow Bumps for those with additional social and care needs during pregnancy and their infants who are at higher risk of maltreatment: study protocol for a randomised controlled trial
Source: Springer Nature journal article supplement (doi:10.1186/s13063-019-3571-5), 2019-08-14
Supplement: MOESM2 [file 17072272]

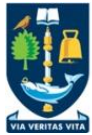

University of Glasgow

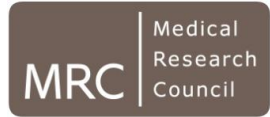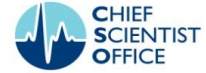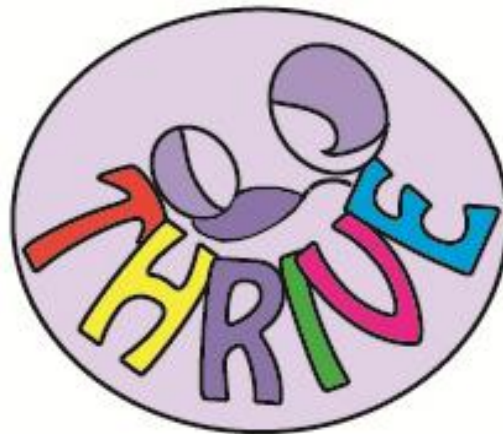

Trial of **H**ealthy **R**elationship **I**nitiatives for the **V**ery **E**arly-years

# Baseline Questionnaire

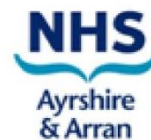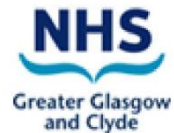

For administration purposes only

Date:

Participant ID: \_\_\_\_\_

Researcher ID: \_\_\_\_\_

Circle as appropriate: SC / SCHR / RC

Randomisation Y / N

Supplementary sheet Y / N

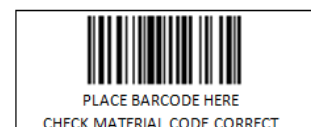

**Your answers will remain confidential and will not be seen by:**

- ◆ **your family or friends**
- ◆ **your health or social care practitioner**

**so please be honest about how you feel and what you think.**

**There are no 'right' or 'wrong' answers. We just want to know what you think and something about your experiences.**

**Please read the instructions carefully.**

**If you are not sure what a question means please ask the researcher.**

**If you do not want to answer a question, please just leave it blank and go on to the next question.**

Please detach this page and give it to the researcher who will file it separately from the rest of the questionnaire.

**What is your date of birth?**

(Please **write in** - for example: 30/03/1983)

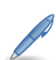

|   |   |
|---|---|
| D | D |
|---|---|

/

|   |   |
|---|---|
| M | M |
|---|---|

/

|   |   |   |   |
|---|---|---|---|
| Y | Y | Y | Y |
|---|---|---|---|

**Do you know your postcode? If so, tick 'yes' and write it down, if no tick 'no'.  
If you only know the beginning then please write this in.**

1

**Yes, my postcode is:**

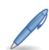

|  |  |  |  |
|--|--|--|--|
|  |  |  |  |
|--|--|--|--|

|  |  |  |
|--|--|--|
|  |  |  |
|--|--|--|

e.g.

K A 1 4

8 R J

G 1 2

8 R Z

2

**No**

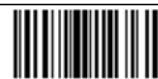

PLACE BARCODE HERE  
CHECK MATERIAL CODE CORRECT

————— **Blank page** —————

## About you

1

**Which religion are you?**  
(Please tick **all that apply**)

None  1

Protestant  1

Roman Catholic  1

Other Christian  
(Please **write in**)  1

Buddhist  1

Hindu  1

Jewish  1

Muslim  1

Sikh  1

Other  
(Please **write in**)  1

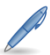

\_\_\_\_\_

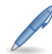

\_\_\_\_\_

2

**Do you go to church or to another place of worship?**  
(Please tick **one box only**)

Yes, at least once a week  1

Yes, at least once a month  2

Yes, at least once a year  3

No, not at all  4

**3 Which ethnic background do you belong to?**  
(Please tick **all** that apply)

**White**

Scottish  1

British  1

English  1

Irish  1

Northern Irish  1

Welsh  1

Any other White background  
(Please **write in**)  1

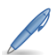

\_\_\_\_\_

**Asian or Asian British**

Bangladeshi  1

Indian  1

Pakistani  1

Any other Asian background  
(Please **write in**)  1

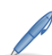

\_\_\_\_\_

**Black or Black British**

African  1

Caribbean  1

Any other Black background  
(Please **write in**)  1

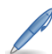

\_\_\_\_\_

**4 How old were you when you left secondary school?**  
(Please **write in**)

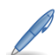

\_\_\_\_\_ Years old

5

**What is your highest educational qualification?**

(Please tick **one box only**)

No educational qualifications  1

Standard Grades, Intermediate 1 or 2, O Grades, O Levels,  
GCE/GCSEs  2

Higher, Advanced Higher, A levels  3

Vocational qualification (e.g. Access, SVQ, SCOTVEC, BTEC)  4

HNC/HND  5

Undergraduate Degree (e.g. BA/BSc)  6

Postgraduate qualification (e.g. MSc, PhD)  7

Other  8  
(Please **write in**)

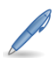

6

**Which of these statements best describes you?**

(Please tick **one box only**)

I am currently in paid employment or self-employed  1

**Go to Question 7**

I am not currently working but have been in paid employment in the past  2

**Go to Question 8**

I have never been in paid employment  3

**Go to Question 11**

7

**How many hours did you work last week?**

(Please **write in**)

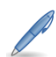

\_\_\_\_\_ Hours

|                                                                                                        |                                                                                                            |
|--------------------------------------------------------------------------------------------------------|------------------------------------------------------------------------------------------------------------|
| <b>8</b>                                                                                               | <b>Please tell us about your current job or your last job if you are not working.</b><br>(Please write in) |
| <b>Job title</b><br>Example: waitress                                                                  |                           |
| <b>What this actually involves</b><br>Example: taking food orders,<br>serving customers food and drink |                           |
| <b>Employer type</b><br>Example: restaurant                                                            |                           |

|                                                                                                                                                                                                                                                                                                                           |                                                                                                                                          |
|---------------------------------------------------------------------------------------------------------------------------------------------------------------------------------------------------------------------------------------------------------------------------------------------------------------------------|------------------------------------------------------------------------------------------------------------------------------------------|
| <b>9</b>                                                                                                                                                                                                                                                                                                                  | <b>Which of these best describes your current job or your last job if you are not working now?</b><br>(Please tick <b>one box only</b> ) |
| <p>Self employed with paid employees <input type="checkbox"/> 1</p> <p>Self employed with NO paid employees <input type="checkbox"/> 2</p> <p>Manager <input type="checkbox"/> 3</p> <p>Supervisor <input type="checkbox"/> 4</p> <p>Employee <input type="checkbox"/> 5</p> <p>Don't know <input type="checkbox"/> 6</p> |                                                                                                                                          |

|                                                                                                                                                  |                                                                              |
|--------------------------------------------------------------------------------------------------------------------------------------------------|------------------------------------------------------------------------------|
| <b>10</b>                                                                                                                                        | <b>What size of company is/was it?</b><br>(Please tick <b>one box only</b> ) |
| <p>Under 25 staff <input type="checkbox"/> 1</p> <p>25 staff or more <input type="checkbox"/> 2</p> <p>Don't know <input type="checkbox"/> 3</p> |                                                                              |



11

Which describes best what you were doing last week?

(Please tick **one box only**)

- In paid employment  1
- Doing unpaid work for a business that you own or that a relative owns  2
- Waiting to take up paid work already obtained  3
- On a Government scheme for employment training  4
- Looking for paid work on a Government training scheme  5
- Intending to look for work but prevented by temporary sickness or illness  6
- Permanently unable to work because of long-term sickness or disability  7
- At college or university full time  8
- At college or university part time  9
- In full time secondary education (e.g. attending high school)  10
- Retired from paid work  11
- Looking after home or family  12
- Providing full time care for an ill or disabled friend or relative  13
- Doing something else  14  
(Please **write in**)

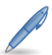

---

---

|           |                                                                                                                                                                                                                                                                                                                                                                                                                                                                                                                                                                                                                                                                                                                                                                                                                                                                                                                                                                                                                                                                                                                                                                                                 |
|-----------|-------------------------------------------------------------------------------------------------------------------------------------------------------------------------------------------------------------------------------------------------------------------------------------------------------------------------------------------------------------------------------------------------------------------------------------------------------------------------------------------------------------------------------------------------------------------------------------------------------------------------------------------------------------------------------------------------------------------------------------------------------------------------------------------------------------------------------------------------------------------------------------------------------------------------------------------------------------------------------------------------------------------------------------------------------------------------------------------------------------------------------------------------------------------------------------------------|
| <b>12</b> | <b>I am currently living...</b><br>(Please tick <b>all that apply</b> )                                                                                                                                                                                                                                                                                                                                                                                                                                                                                                                                                                                                                                                                                                                                                                                                                                                                                                                                                                                                                                                                                                                         |
|           | <p style="text-align: right;">in a house or flat that is owned outright <input type="checkbox"/> 1</p> <p style="text-align: right;">in a house or flat that is being bought with the help of a mortgage or loan <input type="checkbox"/> 1</p> <p style="text-align: right;">in a house or flat rented from a council, local authority or housing association <input type="checkbox"/> 1</p> <p style="text-align: right;">in a house or flat rented from a private landlord <input type="checkbox"/> 1</p> <p style="text-align: right;">at home with my parents <input type="checkbox"/> 1</p> <p style="text-align: right;">rent free with a family member or friend <input type="checkbox"/> 1</p> <p style="text-align: right;">in a hostel, bed and breakfast, homeless shelter or temporary accommodation <input type="checkbox"/> 1</p> <p style="text-align: right;">in a children's unit, foster care placement or supported care placement <input type="checkbox"/> 1</p> <p style="text-align: right;">other (please <b>describe</b>) <input type="checkbox"/> 1</p> <p> _____</p> <p>_____</p> |

|           |                                                                                                                |
|-----------|----------------------------------------------------------------------------------------------------------------|
| <b>13</b> | <b>How many rooms are there in your home, excluding the kitchen and bathroom?</b><br>(Please <b>write in</b> ) |
|           | <p> _____</p>               |

|           |                                                                                                                                                                                                             |
|-----------|-------------------------------------------------------------------------------------------------------------------------------------------------------------------------------------------------------------|
| <b>14</b> | <b>How much of a problem do you have with damp, mould or condensation on the walls in your home, apart from in the kitchen or bathroom?</b><br>(Please tick <b>one box only</b> )                           |
|           | <p>None, there is no damp <input type="checkbox"/> 1      Not much of a problem <input type="checkbox"/> 2</p> <p>Some problem <input type="checkbox"/> 3      Great problem <input type="checkbox"/> 4</p> |

|           |                                                                                                                  |                                                                                          |
|-----------|------------------------------------------------------------------------------------------------------------------|------------------------------------------------------------------------------------------|
| <b>15</b> | <b>In your home, which of these things do you have in working order?</b><br>(Please tick <b>all that apply</b> ) |                                                                                          |
|           | Fridge <input type="checkbox"/> <sub>1</sub>                                                                     | Dishwasher <input type="checkbox"/> <sub>1</sub>                                         |
|           | Freezer <input type="checkbox"/> <sub>1</sub>                                                                    | DVD/Blu ray player <input type="checkbox"/> <sub>1</sub>                                 |
|           | Washing machine <input type="checkbox"/> <sub>1</sub>                                                            | Tumble dryer <input type="checkbox"/> <sub>1</sub>                                       |
|           | Microwave <input type="checkbox"/> <sub>1</sub>                                                                  | Landline telephone <input type="checkbox"/> <sub>1</sub>                                 |
|           | Television <input type="checkbox"/> <sub>1</sub>                                                                 | Cable or Satellite TV<br>(e.g. Sky, Virgin, BT TV) <input type="checkbox"/> <sub>1</sub> |
|           | Broadband internet access <input type="checkbox"/> <sub>1</sub>                                                  | I don't own any of these items <input type="checkbox"/> <sub>1</sub>                     |

|           |                                                                                                                |                                                     |
|-----------|----------------------------------------------------------------------------------------------------------------|-----------------------------------------------------|
| <b>16</b> | <b>How many cars and/or vans do the people living in your house own?</b><br>(Please tick <b>one box only</b> ) |                                                     |
|           | None <input type="checkbox"/> <sub>1</sub>                                                                     | One <input type="checkbox"/> <sub>2</sub>           |
|           | Two <input type="checkbox"/> <sub>3</sub>                                                                      | Three or more <input type="checkbox"/> <sub>4</sub> |

|           |                                                                                                                                                      |                                                     |
|-----------|------------------------------------------------------------------------------------------------------------------------------------------------------|-----------------------------------------------------|
| <b>17</b> | <b>During the past 12 months how many times did you travel away from home (including UK trips) on holiday?</b><br>(Please tick <b>one box only</b> ) |                                                     |
|           | Not at all <input type="checkbox"/> <sub>1</sub>                                                                                                     | Once <input type="checkbox"/> <sub>2</sub>          |
|           | Twice <input type="checkbox"/> <sub>3</sub>                                                                                                          | Three or more <input type="checkbox"/> <sub>4</sub> |

**18** How many people in total (including yourself and all children of all ages) live here most of the time as members of this household?

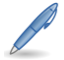

\_\_\_\_\_ Persons

For each member of the household, **excluding you**, could you tell me:

|           | Their relationship to you<br>e.g. partner, daughter, son or friend | Their relationship to your baby<br>e.g. father, sister or grandparent | Sex                                 |                                     | Age<br> | What do they do?<br>(Please tick <b>one</b> box only) |                                     |                          |                          |                                     |                          |                          |                          |                          |
|-----------|--------------------------------------------------------------------|-----------------------------------------------------------------------|-------------------------------------|-------------------------------------|---------|-------------------------------------------------------|-------------------------------------|--------------------------|--------------------------|-------------------------------------|--------------------------|--------------------------|--------------------------|--------------------------|
|           |                                                                    |                                                                       | M                                   | F                                   |         | Pre-school                                            | School                              | College/university       | At work/training         | Unemployed                          | Retired                  | House-person             | Other                    |                          |
| Example 1 | Partner                                                            | Father                                                                | <input checked="" type="checkbox"/> | <input type="checkbox"/>            | 28      | <input type="checkbox"/>                              | <input type="checkbox"/>            | <input type="checkbox"/> | <input type="checkbox"/> | <input checked="" type="checkbox"/> | <input type="checkbox"/> | <input type="checkbox"/> | <input type="checkbox"/> | <input type="checkbox"/> |
| Example 2 | Daughter                                                           | Sister                                                                | <input type="checkbox"/>            | <input checked="" type="checkbox"/> | 6       | <input type="checkbox"/>                              | <input checked="" type="checkbox"/> | <input type="checkbox"/> | <input type="checkbox"/> | <input type="checkbox"/>            | <input type="checkbox"/> | <input type="checkbox"/> | <input type="checkbox"/> | <input type="checkbox"/> |
|           |                                                                    |                                                                       | <input type="checkbox"/>            | <input type="checkbox"/>            |         | <input type="checkbox"/>                              | <input type="checkbox"/>            | <input type="checkbox"/> | <input type="checkbox"/> | <input type="checkbox"/>            | <input type="checkbox"/> | <input type="checkbox"/> | <input type="checkbox"/> | <input type="checkbox"/> |
|           |                                                                    |                                                                       | <input type="checkbox"/>            | <input type="checkbox"/>            |         | <input type="checkbox"/>                              | <input type="checkbox"/>            | <input type="checkbox"/> | <input type="checkbox"/> | <input type="checkbox"/>            | <input type="checkbox"/> | <input type="checkbox"/> | <input type="checkbox"/> | <input type="checkbox"/> |
|           |                                                                    |                                                                       | <input type="checkbox"/>            | <input type="checkbox"/>            |         | <input type="checkbox"/>                              | <input type="checkbox"/>            | <input type="checkbox"/> | <input type="checkbox"/> | <input type="checkbox"/>            | <input type="checkbox"/> | <input type="checkbox"/> | <input type="checkbox"/> | <input type="checkbox"/> |
|           |                                                                    |                                                                       | <input type="checkbox"/>            | <input type="checkbox"/>            |         | <input type="checkbox"/>                              | <input type="checkbox"/>            | <input type="checkbox"/> | <input type="checkbox"/> | <input type="checkbox"/>            | <input type="checkbox"/> | <input type="checkbox"/> | <input type="checkbox"/> | <input type="checkbox"/> |
|           |                                                                    |                                                                       | <input type="checkbox"/>            | <input type="checkbox"/>            |         | <input type="checkbox"/>                              | <input type="checkbox"/>            | <input type="checkbox"/> | <input type="checkbox"/> | <input type="checkbox"/>            | <input type="checkbox"/> | <input type="checkbox"/> | <input type="checkbox"/> | <input type="checkbox"/> |
|           |                                                                    |                                                                       | <input type="checkbox"/>            | <input type="checkbox"/>            |         | <input type="checkbox"/>                              | <input type="checkbox"/>            | <input type="checkbox"/> | <input type="checkbox"/> | <input type="checkbox"/>            | <input type="checkbox"/> | <input type="checkbox"/> | <input type="checkbox"/> | <input type="checkbox"/> |
|           |                                                                    |                                                                       | <input type="checkbox"/>            | <input type="checkbox"/>            |         | <input type="checkbox"/>                              | <input type="checkbox"/>            | <input type="checkbox"/> | <input type="checkbox"/> | <input type="checkbox"/>            | <input type="checkbox"/> | <input type="checkbox"/> | <input type="checkbox"/> | <input type="checkbox"/> |
|           |                                                                    |                                                                       | <input type="checkbox"/>            | <input type="checkbox"/>            |         | <input type="checkbox"/>                              | <input type="checkbox"/>            | <input type="checkbox"/> | <input type="checkbox"/> | <input type="checkbox"/>            | <input type="checkbox"/> | <input type="checkbox"/> | <input type="checkbox"/> | <input type="checkbox"/> |
|           |                                                                    |                                                                       | <input type="checkbox"/>            | <input type="checkbox"/>            |         | <input type="checkbox"/>                              | <input type="checkbox"/>            | <input type="checkbox"/> | <input type="checkbox"/> | <input type="checkbox"/>            | <input type="checkbox"/> | <input type="checkbox"/> | <input type="checkbox"/> | <input type="checkbox"/> |

## Your childbirth history

|           |                                                                            |
|-----------|----------------------------------------------------------------------------|
| <b>19</b> | <b>Is this your first pregnancy?</b><br>(Please tick <b>one box only</b> ) |
| Yes       | <input type="checkbox"/> <sub>1</sub> <b>Go to Question 25</b>             |
| No        | <input type="checkbox"/> <sub>2</sub> <b>Go to Question 20</b>             |

| <b>20</b>                   | <b>Have you ever had...</b><br>(Please tick <b>one box per line</b> )                                                                                                                                                                                                                                                                                       |                                       |     |    |                |                                       |                                       |                             |                                       |                                       |
|-----------------------------|-------------------------------------------------------------------------------------------------------------------------------------------------------------------------------------------------------------------------------------------------------------------------------------------------------------------------------------------------------------|---------------------------------------|-----|----|----------------|---------------------------------------|---------------------------------------|-----------------------------|---------------------------------------|---------------------------------------|
|                             | <table><thead><tr><th></th><th>Yes</th><th>No</th></tr></thead><tbody><tr><td>a miscarriage?</td><td><input type="checkbox"/> <sub>1</sub></td><td><input type="checkbox"/> <sub>2</sub></td></tr><tr><td>an abortion or termination?</td><td><input type="checkbox"/> <sub>1</sub></td><td><input type="checkbox"/> <sub>2</sub></td></tr></tbody></table> |                                       | Yes | No | a miscarriage? | <input type="checkbox"/> <sub>1</sub> | <input type="checkbox"/> <sub>2</sub> | an abortion or termination? | <input type="checkbox"/> <sub>1</sub> | <input type="checkbox"/> <sub>2</sub> |
|                             | Yes                                                                                                                                                                                                                                                                                                                                                         | No                                    |     |    |                |                                       |                                       |                             |                                       |                                       |
| a miscarriage?              | <input type="checkbox"/> <sub>1</sub>                                                                                                                                                                                                                                                                                                                       | <input type="checkbox"/> <sub>2</sub> |     |    |                |                                       |                                       |                             |                                       |                                       |
| an abortion or termination? | <input type="checkbox"/> <sub>1</sub>                                                                                                                                                                                                                                                                                                                       | <input type="checkbox"/> <sub>2</sub> |     |    |                |                                       |                                       |                             |                                       |                                       |

|                                                                                     |                                                                                      |
|-------------------------------------------------------------------------------------|--------------------------------------------------------------------------------------|
| <b>21</b>                                                                           | <b>How old were you when you first became pregnant?</b><br>(Please <b>write in</b> ) |
|  | _____ Years                                                                          |

|                                                                                     |                                                                                                      |
|-------------------------------------------------------------------------------------|------------------------------------------------------------------------------------------------------|
| <b>22</b>                                                                           | <b>How many times have you been pregnant, including this pregnancy?</b><br>(Please <b>write in</b> ) |
|  | _____ Times                                                                                          |

| 23                                                                                            | Did any of the following happen during any of your previous pregnancies?<br>(Please tick <b>one box per line</b> ) |                            |
|-----------------------------------------------------------------------------------------------|--------------------------------------------------------------------------------------------------------------------|----------------------------|
|                                                                                               | Yes                                                                                                                | No                         |
| I experienced anxiety or depression                                                           | <input type="checkbox"/> 1                                                                                         | <input type="checkbox"/> 2 |
| I regularly drank alcohol to the point of drunkenness                                         | <input type="checkbox"/> 1                                                                                         | <input type="checkbox"/> 2 |
| I regularly used illegal (street) drugs                                                       | <input type="checkbox"/> 1                                                                                         | <input type="checkbox"/> 2 |
| I was prescribed an opiate substitute<br>(e.g. methadone or buprenorphine (Subutex/Suboxone)) | <input type="checkbox"/> 1                                                                                         | <input type="checkbox"/> 2 |
| My partner/the father of my baby was abusive to me                                            | <input type="checkbox"/> 1                                                                                         | <input type="checkbox"/> 2 |
| I had a social worker                                                                         | <input type="checkbox"/> 1                                                                                         | <input type="checkbox"/> 2 |
| I was homeless for all or part of my pregnancy                                                | <input type="checkbox"/> 1                                                                                         | <input type="checkbox"/> 2 |
| I experienced complications that required medication                                          | <input type="checkbox"/> 1                                                                                         | <input type="checkbox"/> 2 |
| I experienced complications that required a stay in hospital                                  | <input type="checkbox"/> 1                                                                                         | <input type="checkbox"/> 2 |
| I experienced complications during the birth/labour                                           | <input type="checkbox"/> 1                                                                                         | <input type="checkbox"/> 2 |
| My child was born prematurely                                                                 | <input type="checkbox"/> 1                                                                                         | <input type="checkbox"/> 2 |
| My child was kept in hospital after birth for medical treatment                               | <input type="checkbox"/> 1                                                                                         | <input type="checkbox"/> 2 |
| My child died during pregnancy, was stillborn or died shortly after birth                     | <input type="checkbox"/> 1                                                                                         | <input type="checkbox"/> 2 |
| My child was removed by social work services at birth                                         | <input type="checkbox"/> 1                                                                                         | <input type="checkbox"/> 2 |
| My child was removed by social work services before their first birthday                      | <input type="checkbox"/> 1                                                                                         | <input type="checkbox"/> 2 |

| 24    |                      | For each pregnancy that resulted in a live birth, we would like to ask you some questions.<br>(Please fill out <b>one line for each child</b> you have given birth to) |                            |                                                |                            |                                                               |                            |
|-------|----------------------|------------------------------------------------------------------------------------------------------------------------------------------------------------------------|----------------------------|------------------------------------------------|----------------------------|---------------------------------------------------------------|----------------------------|
| Child | Year of birth        | Sex                                                                                                                                                                    |                            | Was this child born before 37 weeks gestation? |                            | Did this child weigh less than 2.5 Kg (5 lbs 8 oz) when born? |                            |
|       |                      | M                                                                                                                                                                      | F                          | Yes                                            | No                         | Yes                                                           | No                         |
| 1     | <input type="text"/> | <input type="checkbox"/> 1                                                                                                                                             | <input type="checkbox"/> 2 | <input type="checkbox"/> 1                     | <input type="checkbox"/> 2 | <input type="checkbox"/> 1                                    | <input type="checkbox"/> 2 |
| 2     | <input type="text"/> | <input type="checkbox"/> 1                                                                                                                                             | <input type="checkbox"/> 2 | <input type="checkbox"/> 1                     | <input type="checkbox"/> 2 | <input type="checkbox"/> 1                                    | <input type="checkbox"/> 2 |
| 3     | <input type="text"/> | <input type="checkbox"/> 1                                                                                                                                             | <input type="checkbox"/> 2 | <input type="checkbox"/> 1                     | <input type="checkbox"/> 2 | <input type="checkbox"/> 1                                    | <input type="checkbox"/> 2 |
| 4     | <input type="text"/> | <input type="checkbox"/> 1                                                                                                                                             | <input type="checkbox"/> 2 | <input type="checkbox"/> 1                     | <input type="checkbox"/> 2 | <input type="checkbox"/> 1                                    | <input type="checkbox"/> 2 |
| 5     | <input type="text"/> | <input type="checkbox"/> 1                                                                                                                                             | <input type="checkbox"/> 2 | <input type="checkbox"/> 1                     | <input type="checkbox"/> 2 | <input type="checkbox"/> 1                                    | <input type="checkbox"/> 2 |

## This pregnancy

**25** Have you been told your expected “due date”? This is the estimated date that you will give birth to your baby.  
(Please tick **one box only**)

Yes  <sub>1</sub>      **Go to Question 26**

No  <sub>2</sub>      **Go to Question 27**

**26** What is your expected due date?  
(Please **write in** - for example: 15/03/2014)

   /   /

**27** How many babies have you been told that you are having?  
(Please tick **one box only**)

One  <sub>1</sub>      Two  <sub>2</sub>      Three  <sub>3</sub>      Four or more  <sub>4</sub>

**28** Other than your midwife or other medical professionals, who do you want to be with you when you are having the baby?  
(Please tick **all that apply**)

The baby's father  <sub>1</sub>

My current partner (if different from baby's father)  <sub>1</sub>

My Mum  <sub>1</sub>

My Dad  <sub>1</sub>

Another family member  <sub>1</sub>

My friend  <sub>1</sub>

I do not feel that I have anyone to support me  <sub>1</sub>

I do not want anyone to support me  <sub>1</sub>

Other (please **write in**, e.g. key worker/social worker)  <sub>1</sub>

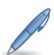

|                                                                                                                                                                                                                                      |                                                                                               |
|--------------------------------------------------------------------------------------------------------------------------------------------------------------------------------------------------------------------------------------|-----------------------------------------------------------------------------------------------|
| <b>29</b>                                                                                                                                                                                                                            | <b>Where would you like to give birth to your baby?</b><br>(Please tick <b>one box only</b> ) |
| <p>At home <input type="checkbox"/> 1</p> <p>In a midwifery led unit <input type="checkbox"/> 2</p> <p>In a consultant led unit at a hospital <input type="checkbox"/> 3</p> <p>I haven't decided yet <input type="checkbox"/> 4</p> |                                                                                               |

|                                                                                                                                                                                                                                                                    |                                                                                                                                                      |  |
|--------------------------------------------------------------------------------------------------------------------------------------------------------------------------------------------------------------------------------------------------------------------|------------------------------------------------------------------------------------------------------------------------------------------------------|--|
| <b>30</b>                                                                                                                                                                                                                                                          | <b>Some pregnancies are planned and others are a surprise. Which of these best describes your pregnancy?</b><br>(Please tick <b>all that apply</b> ) |  |
| <p>We both hoped it would happen <input type="checkbox"/> 1      I hoped it would happen <input type="checkbox"/> 2</p> <p>My partner/the father of my baby hoped it would happen <input type="checkbox"/> 3      It wasn't planned <input type="checkbox"/> 4</p> |                                                                                                                                                      |  |

|                                                                                                                                                                                                                                                                                                                                                                                                                                                                                                                                                                                                                                                                                                                                                                                                                                                               |                                                                                                                  |            |  |           |        |       |              |         |         |           |           |         |        |         |           |       |          |      |            |         |            |           |         |       |        |        |         |        |       |      |
|---------------------------------------------------------------------------------------------------------------------------------------------------------------------------------------------------------------------------------------------------------------------------------------------------------------------------------------------------------------------------------------------------------------------------------------------------------------------------------------------------------------------------------------------------------------------------------------------------------------------------------------------------------------------------------------------------------------------------------------------------------------------------------------------------------------------------------------------------------------|------------------------------------------------------------------------------------------------------------------|------------|--|-----------|--------|-------|--------------|---------|---------|-----------|-----------|---------|--------|---------|-----------|-------|----------|------|------------|---------|------------|-----------|---------|-------|--------|--------|---------|--------|-------|------|
| <b>31</b>                                                                                                                                                                                                                                                                                                                                                                                                                                                                                                                                                                                                                                                                                                                                                                                                                                                     | <b>Which of the following have you felt since you became pregnant?</b><br>(Please circle <b>all that apply</b> ) |            |  |           |        |       |              |         |         |           |           |         |        |         |           |       |          |      |            |         |            |           |         |       |        |        |         |        |       |      |
| <table style="width: 100%; border: none;"> <tr> <td style="width: 33%;">Protected</td> <td style="width: 33%;">Unsure</td> <td style="width: 33%;">Happy</td> </tr> <tr> <td>Not bothered</td> <td>Excited</td> <td>Anxious</td> </tr> <tr> <td>Resentful</td> <td>Irritable</td> <td>Relaxed</td> </tr> <tr> <td>Loving</td> <td>Worried</td> <td>Supported</td> </tr> <tr> <td>Angry</td> <td>Confused</td> <td>Calm</td> </tr> <tr> <td>Don't care</td> <td>Unhappy</td> <td>Protective</td> </tr> <tr> <td>Laid-back</td> <td>Serious</td> <td>Proud</td> </tr> <tr> <td>Scared</td> <td>Caring</td> <td>Nervous</td> </tr> <tr> <td>Strong</td> <td>Other</td> <td>Weak</td> </tr> </table> <p style="text-align: center; margin-top: 10px;">↓</p> <hr style="width: 60%; margin: 0 auto;"/> <p style="text-align: center;">(Please <b>write in</b>)</p> |                                                                                                                  |            |  | Protected | Unsure | Happy | Not bothered | Excited | Anxious | Resentful | Irritable | Relaxed | Loving | Worried | Supported | Angry | Confused | Calm | Don't care | Unhappy | Protective | Laid-back | Serious | Proud | Scared | Caring | Nervous | Strong | Other | Weak |
| Protected                                                                                                                                                                                                                                                                                                                                                                                                                                                                                                                                                                                                                                                                                                                                                                                                                                                     | Unsure                                                                                                           | Happy      |  |           |        |       |              |         |         |           |           |         |        |         |           |       |          |      |            |         |            |           |         |       |        |        |         |        |       |      |
| Not bothered                                                                                                                                                                                                                                                                                                                                                                                                                                                                                                                                                                                                                                                                                                                                                                                                                                                  | Excited                                                                                                          | Anxious    |  |           |        |       |              |         |         |           |           |         |        |         |           |       |          |      |            |         |            |           |         |       |        |        |         |        |       |      |
| Resentful                                                                                                                                                                                                                                                                                                                                                                                                                                                                                                                                                                                                                                                                                                                                                                                                                                                     | Irritable                                                                                                        | Relaxed    |  |           |        |       |              |         |         |           |           |         |        |         |           |       |          |      |            |         |            |           |         |       |        |        |         |        |       |      |
| Loving                                                                                                                                                                                                                                                                                                                                                                                                                                                                                                                                                                                                                                                                                                                                                                                                                                                        | Worried                                                                                                          | Supported  |  |           |        |       |              |         |         |           |           |         |        |         |           |       |          |      |            |         |            |           |         |       |        |        |         |        |       |      |
| Angry                                                                                                                                                                                                                                                                                                                                                                                                                                                                                                                                                                                                                                                                                                                                                                                                                                                         | Confused                                                                                                         | Calm       |  |           |        |       |              |         |         |           |           |         |        |         |           |       |          |      |            |         |            |           |         |       |        |        |         |        |       |      |
| Don't care                                                                                                                                                                                                                                                                                                                                                                                                                                                                                                                                                                                                                                                                                                                                                                                                                                                    | Unhappy                                                                                                          | Protective |  |           |        |       |              |         |         |           |           |         |        |         |           |       |          |      |            |         |            |           |         |       |        |        |         |        |       |      |
| Laid-back                                                                                                                                                                                                                                                                                                                                                                                                                                                                                                                                                                                                                                                                                                                                                                                                                                                     | Serious                                                                                                          | Proud      |  |           |        |       |              |         |         |           |           |         |        |         |           |       |          |      |            |         |            |           |         |       |        |        |         |        |       |      |
| Scared                                                                                                                                                                                                                                                                                                                                                                                                                                                                                                                                                                                                                                                                                                                                                                                                                                                        | Caring                                                                                                           | Nervous    |  |           |        |       |              |         |         |           |           |         |        |         |           |       |          |      |            |         |            |           |         |       |        |        |         |        |       |      |
| Strong                                                                                                                                                                                                                                                                                                                                                                                                                                                                                                                                                                                                                                                                                                                                                                                                                                                        | Other                                                                                                            | Weak       |  |           |        |       |              |         |         |           |           |         |        |         |           |       |          |      |            |         |            |           |         |       |        |        |         |        |       |      |



| 32                                                                                    | The following questions are about how you have been feeling during the past month.<br>(Please tick <b>one box per line</b> ) |                            |                            |                            |                   |
|---------------------------------------------------------------------------------------|------------------------------------------------------------------------------------------------------------------------------|----------------------------|----------------------------|----------------------------|-------------------|
|                                                                                       |                                                                                                                              | <b>Not at all</b>          | <b>A little</b>            | <b>A lot</b>               | <b>Very much</b>  |
| Have you been worrying that you might not be a good mother?                           | <input type="checkbox"/> 1                                                                                                   | <input type="checkbox"/> 2 | <input type="checkbox"/> 3 | <input type="checkbox"/> 4 |                   |
| Have you been worrying about hurting your baby inside you?                            | <input type="checkbox"/> 1                                                                                                   | <input type="checkbox"/> 2 | <input type="checkbox"/> 3 | <input type="checkbox"/> 4 |                   |
| Has it worried you that you may not have any time to yourself once your baby is born? | <input type="checkbox"/> 1                                                                                                   | <input type="checkbox"/> 2 | <input type="checkbox"/> 3 | <input type="checkbox"/> 4 |                   |
| Have you been feeling happy that you are pregnant?                                    | <input type="checkbox"/> 1                                                                                                   | <input type="checkbox"/> 2 | <input type="checkbox"/> 3 | <input type="checkbox"/> 4 |                   |
| Has the thought of having more children appealed to you?                              | <input type="checkbox"/> 1                                                                                                   | <input type="checkbox"/> 2 | <input type="checkbox"/> 3 | <input type="checkbox"/> 4 |                   |
| Have you been looking forward to caring for your baby's needs?                        | <input type="checkbox"/> 1                                                                                                   | <input type="checkbox"/> 2 | <input type="checkbox"/> 3 | <input type="checkbox"/> 4 |                   |
| Have you been wondering whether your baby will be healthy and normal?                 | <input type="checkbox"/> 1                                                                                                   | <input type="checkbox"/> 2 | <input type="checkbox"/> 3 | <input type="checkbox"/> 4 |                   |
| Have you felt that life will be more difficult after the baby is born?                | <input type="checkbox"/> 1                                                                                                   | <input type="checkbox"/> 2 | <input type="checkbox"/> 3 | <input type="checkbox"/> 4 |                   |
| Has the thought of breastfeeding your baby appealed to you?                           | <input type="checkbox"/> 1                                                                                                   | <input type="checkbox"/> 2 | <input type="checkbox"/> 3 | <input type="checkbox"/> 4 |                   |
|                                                                                       |                                                                                                                              | <b>Very much</b>           | <b>A lot</b>               | <b>A little</b>            | <b>Not at all</b> |
| Has the thought of wearing maternity clothes appealed to you?                         | <input type="checkbox"/> 4                                                                                                   | <input type="checkbox"/> 3 | <input type="checkbox"/> 2 | <input type="checkbox"/> 1 |                   |
| Have you felt that pregnancy was unpleasant?                                          | <input type="checkbox"/> 4                                                                                                   | <input type="checkbox"/> 3 | <input type="checkbox"/> 2 | <input type="checkbox"/> 1 |                   |
|                                                                                       |                                                                                                                              | <b>Never</b>               | <b>Rarely</b>              | <b>Often</b>               | <b>Very often</b> |
| Have you regretted being pregnant?                                                    | <input type="checkbox"/> 1                                                                                                   | <input type="checkbox"/> 2 | <input type="checkbox"/> 3 | <input type="checkbox"/> 4 |                   |

## Your health and wellbeing

**33** Thinking about your pregnancy so far, would you say that you have generally been ...  
(Please tick **one box only**)

|                                       |                                       |                                       |                                       |
|---------------------------------------|---------------------------------------|---------------------------------------|---------------------------------------|
| very well                             | fairly well                           | not very well                         | not well at all                       |
| <input type="checkbox"/> <sub>1</sub> | <input type="checkbox"/> <sub>2</sub> | <input type="checkbox"/> <sub>3</sub> | <input type="checkbox"/> <sub>4</sub> |

**34** Which of these statements best describes you?  
(Please tick **one box only**)

|            |                                       |                          |
|------------|---------------------------------------|--------------------------|
| Smoker     | <input type="checkbox"/> <sub>1</sub> | <b>Go to Question 36</b> |
| Ex-smoker  | <input type="checkbox"/> <sub>2</sub> | <b>Go to Question 35</b> |
| Non-smoker | <input type="checkbox"/> <sub>3</sub> | <b>Go to Question 37</b> |

**35** How long has it been since you stopped smoking?  
(Please **write in**, if you're not sure then please write in your best guess)

 \_\_\_\_\_ years    \_\_\_\_\_ months    \_\_\_\_\_ days

**36** On average how many cigarettes did you smoke **per day** ...  
(Please tick **one box per column**)

|              | before you found out<br>you were pregnant? | since you found out<br>you were pregnant? |
|--------------|--------------------------------------------|-------------------------------------------|
| None         | <input type="checkbox"/> <sub>1</sub>      | <input type="checkbox"/> <sub>1</sub>     |
| 10 or less   | <input type="checkbox"/> <sub>2</sub>      | <input type="checkbox"/> <sub>2</sub>     |
| 11 – 20      | <input type="checkbox"/> <sub>3</sub>      | <input type="checkbox"/> <sub>3</sub>     |
| 21 – 30      | <input type="checkbox"/> <sub>4</sub>      | <input type="checkbox"/> <sub>4</sub>     |
| More than 30 | <input type="checkbox"/> <sub>5</sub>      | <input type="checkbox"/> <sub>5</sub>     |

| 37                     | How often did you drink until you felt drunk...<br>(Please tick <b>one box per column</b> ) |                                           |
|------------------------|---------------------------------------------------------------------------------------------|-------------------------------------------|
|                        | before you found out<br>you were pregnant?                                                  | since you found out<br>you were pregnant? |
| Every day per week     | <input type="checkbox"/> 1                                                                  | <input type="checkbox"/> 1                |
| A few days per week    | <input type="checkbox"/> 2                                                                  | <input type="checkbox"/> 2                |
| A few days per month   | <input type="checkbox"/> 3                                                                  | <input type="checkbox"/> 3                |
| Once or more per month | <input type="checkbox"/> 4                                                                  | <input type="checkbox"/> 4                |
| Never                  | <input type="checkbox"/> 5                                                                  | <input type="checkbox"/> 5                |

| 38                                           | Why do you drink alcohol?<br>(Please circle <b>all that apply</b> ) |                        |                            |
|----------------------------------------------|---------------------------------------------------------------------|------------------------|----------------------------|
| To relax                                     | To forget                                                           | To have a good time    |                            |
| To numb pain                                 | To de-stress                                                        | Boredom                |                            |
| I like the taste                             | Everyone does it                                                    | To feel more confident |                            |
| My family/friends tell me to                 | Habit                                                               | To get drunk           |                            |
| I do not drink alcohol (please <b>tick</b> ) |                                                                     |                        | <input type="checkbox"/> 1 |

| 39                         | Have you ever smoked cannabis?<br>(Please tick <b>all that apply</b> ) |  |
|----------------------------|------------------------------------------------------------------------|--|
| No                         | <input type="checkbox"/> 1                                             |  |
| Yes, in the past           | <input type="checkbox"/> 1                                             |  |
| Yes, during this pregnancy | <input type="checkbox"/> 1                                             |  |

|           |                                                                                                                                                                                                                                                                                                                                                                     |
|-----------|---------------------------------------------------------------------------------------------------------------------------------------------------------------------------------------------------------------------------------------------------------------------------------------------------------------------------------------------------------------------|
| <b>40</b> | <p><b>Have you ever taken any other illegal (street) drug? (e.g. heroin, crack/cocaine, valium, ecstasy)</b><br/>(Please tick <b>all that apply</b>)</p>                                                                                                                                                                                                            |
|           | <p style="text-align: center;">No <input type="checkbox"/> <sub>1</sub>      <b>Go to Question 44</b></p> <p style="text-align: center;">Yes, in the past <input type="checkbox"/> <sub>1</sub>      <b>Go to Question 41</b></p> <p style="text-align: center;">Yes, during this pregnancy <input type="checkbox"/> <sub>1</sub>      <b>Go to Question 41</b></p> |

|           |                                                                                                                                                                                                                                                                           |
|-----------|---------------------------------------------------------------------------------------------------------------------------------------------------------------------------------------------------------------------------------------------------------------------------|
| <b>41</b> | <p><b>Have you ever injected any illegal (street) drug? (e.g. heroin, crack/cocaine, temazepam, amphetamines)</b><br/>(Please tick <b>all that apply</b>)</p>                                                                                                             |
|           | <p style="text-align: center;">No <input type="checkbox"/> <sub>1</sub></p> <p style="text-align: center;">Yes, in the past <input type="checkbox"/> <sub>1</sub></p> <p style="text-align: center;">Yes, during this pregnancy <input type="checkbox"/> <sub>1</sub></p> |

|           |                                                                                                                                                                                                                                                                                                                                                    |
|-----------|----------------------------------------------------------------------------------------------------------------------------------------------------------------------------------------------------------------------------------------------------------------------------------------------------------------------------------------------------|
| <b>42</b> | <p><b>Are you currently being prescribed an opiate substitute drug? (e.g. methadone or buprenorphine (Subutex/Suboxone))</b><br/>(Please tick <b>one box only</b>)</p>                                                                                                                                                                             |
|           | <p style="text-align: center;">No <input type="checkbox"/> <sub>1</sub>      <b>Go to Question 44</b></p> <p style="text-align: center;">Methadone <input type="checkbox"/> <sub>2</sub>      <b>Go to Question 43</b></p> <p style="text-align: center;">Subutex/Suboxone <input type="checkbox"/> <sub>3</sub>      <b>Go to Question 43</b></p> |

|           |                                                                                                                                                                                                                                                                                                                                                             |
|-----------|-------------------------------------------------------------------------------------------------------------------------------------------------------------------------------------------------------------------------------------------------------------------------------------------------------------------------------------------------------------|
| <b>43</b> | <p><b>Are you using opiate substitute drugs that are not prescribed to you? (e.g. street methadone or buprenorphine (Subutex/Suboxone))</b><br/>(Please tick <b>one box only</b>)</p>                                                                                                                                                                       |
|           | <p style="text-align: center;">No <input type="checkbox"/> <sub>1</sub></p> <p style="text-align: center;">Yes, I am buying it from someone <input type="checkbox"/> <sub>2</sub></p> <p style="text-align: center;">Yes, I have been prescribed an opiate substitute <b>and</b> I am also buying it from someone <input type="checkbox"/> <sub>3</sub></p> |

**44**

The following questions are about your substance use. Please answer these questions about one substance you have used in the last month (for example: cigarettes/alcohol/cannabis/heroin/crack).

If you don't smoke cigarettes, drink alcohol or take any illegal substances please tick the box below

<sub>1</sub> then go to Question 45

**Which substance are you telling us about?**

(Please write in)

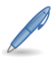

\_\_\_\_\_

**Now answer the questions below:**

(Please tick **one** box per line)

|                                                                          | Never/<br>almost<br>never  | Sometimes                  | Often                      | Always/<br>nearly<br>always |
|--------------------------------------------------------------------------|----------------------------|----------------------------|----------------------------|-----------------------------|
| Do you think your use was out of control?                                | <input type="checkbox"/> 0 | <input type="checkbox"/> 1 | <input type="checkbox"/> 2 | <input type="checkbox"/> 3  |
| Did the prospect of missing a fix (or dose) make you anxious or worried? | <input type="checkbox"/> 0 | <input type="checkbox"/> 1 | <input type="checkbox"/> 2 | <input type="checkbox"/> 3  |
| Did you worry about your use?                                            | <input type="checkbox"/> 0 | <input type="checkbox"/> 1 | <input type="checkbox"/> 2 | <input type="checkbox"/> 3  |
| Did you wish you could stop?                                             | <input type="checkbox"/> 0 | <input type="checkbox"/> 1 | <input type="checkbox"/> 2 | <input type="checkbox"/> 3  |
|                                                                          |                            |                            |                            |                             |
|                                                                          | Not<br>difficult           | Quite<br>difficult         | Very<br>difficult          | Impossible                  |
| How difficult would you find it to stop or go without?                   | <input type="checkbox"/> 0 | <input type="checkbox"/> 1 | <input type="checkbox"/> 2 | <input type="checkbox"/> 3  |

45

Listed below are a number of events.

Thinking about the last year, please read each item carefully and then answer in one of the following ways:

- A No, the event has not happened
- B Yes, but I no longer feel affected by the event
- C Yes, and I am still affected by the event

\* immediate family includes: mother, father, sister, brother, partner, child

(Please tick **one box per line**)

|                                                                                                                                                                                                                                             | A                          | B                              | C                            |
|---------------------------------------------------------------------------------------------------------------------------------------------------------------------------------------------------------------------------------------------|----------------------------|--------------------------------|------------------------------|
|                                                                                                                                                                                                                                             | No                         | Yes, but it does not affect me | Yes, and it still affects me |
| Have you had a serious illness or been seriously injured?                                                                                                                                                                                   | <input type="checkbox"/> 1 | <input type="checkbox"/> 2     | <input type="checkbox"/> 3   |
| Has one of your immediate family* been seriously ill or injured?                                                                                                                                                                            | <input type="checkbox"/> 1 | <input type="checkbox"/> 2     | <input type="checkbox"/> 3   |
| Have any of your close friends or other close relatives been seriously ill or injured?                                                                                                                                                      | <input type="checkbox"/> 1 | <input type="checkbox"/> 2     | <input type="checkbox"/> 3   |
| Have any of your immediate family died?                                                                                                                                                                                                     | <input type="checkbox"/> 1 | <input type="checkbox"/> 2     | <input type="checkbox"/> 3   |
| Have any of your other close relatives or close friends died?                                                                                                                                                                               | <input type="checkbox"/> 1 | <input type="checkbox"/> 2     | <input type="checkbox"/> 3   |
| Have you separated from your partner (not including death)?                                                                                                                                                                                 | <input type="checkbox"/> 1 | <input type="checkbox"/> 2     | <input type="checkbox"/> 3   |
| Has a child living in your household been placed on the child protection register or been taken into care?                                                                                                                                  | <input type="checkbox"/> 1 | <input type="checkbox"/> 2     | <input type="checkbox"/> 3   |
| Have you had any serious problem with a close friend, neighbour or relative?                                                                                                                                                                | <input type="checkbox"/> 1 | <input type="checkbox"/> 2     | <input type="checkbox"/> 3   |
| Have you, or an immediate family member been subject to serious racial abuse, attack or threats?                                                                                                                                            | <input type="checkbox"/> 1 | <input type="checkbox"/> 2     | <input type="checkbox"/> 3   |
| Have you, or an immediate family member been subject to any abuse, attack, threat – perhaps due to you or someone close to you having a disability of any kind (i.e. a mental health problem, a learning disability or a physical problem)? | <input type="checkbox"/> 1 | <input type="checkbox"/> 2     | <input type="checkbox"/> 3   |

|                                                                                                             | A                          | B                              | C                            |
|-------------------------------------------------------------------------------------------------------------|----------------------------|--------------------------------|------------------------------|
|                                                                                                             | No                         | Yes, but it does not affect me | Yes, and it still affects me |
| Have you, or an immediate family member been subject to any other form of serious abuse, attack, or threat? | <input type="checkbox"/> 1 | <input type="checkbox"/> 2     | <input type="checkbox"/> 3   |
| Have you or your partner been unemployed or seeking work for more than one month?                           | <input type="checkbox"/> 1 | <input type="checkbox"/> 2     | <input type="checkbox"/> 3   |
| Have you or your partner been sacked from your job or made redundant?                                       | <input type="checkbox"/> 1 | <input type="checkbox"/> 2     | <input type="checkbox"/> 3   |
| Have you had any major financial difficulties (e.g. debts, difficulty paying bills)?                        | <input type="checkbox"/> 1 | <input type="checkbox"/> 2     | <input type="checkbox"/> 3   |
| Have you, or an immediate family member had any police contact or been in a court appearance?               | <input type="checkbox"/> 1 | <input type="checkbox"/> 2     | <input type="checkbox"/> 3   |
| Have you or an immediate member of your family been burgled or mugged?                                      | <input type="checkbox"/> 1 | <input type="checkbox"/> 2     | <input type="checkbox"/> 3   |
| Has another individual who lives with you given birth?                                                      | <input type="checkbox"/> 1 | <input type="checkbox"/> 2     | <input type="checkbox"/> 3   |
| Has another individual who lives with you suffered from a miscarriage or had a stillbirth?                  | <input type="checkbox"/> 1 | <input type="checkbox"/> 2     | <input type="checkbox"/> 3   |
| Have you moved house (through choice)?                                                                      | <input type="checkbox"/> 1 | <input type="checkbox"/> 2     | <input type="checkbox"/> 3   |
| Have you moved house (not through choice)?                                                                  | <input type="checkbox"/> 1 | <input type="checkbox"/> 2     | <input type="checkbox"/> 3   |
| Have you had any housing difficulties?                                                                      | <input type="checkbox"/> 1 | <input type="checkbox"/> 2     | <input type="checkbox"/> 3   |
| Have you been homeless?                                                                                     | <input type="checkbox"/> 1 | <input type="checkbox"/> 2     | <input type="checkbox"/> 3   |
| Have you had any other significant event happen? ( Please <b>write in</b> )                                 | <input type="checkbox"/> 1 | <input type="checkbox"/> 2     | <input type="checkbox"/> 3   |



---

46

There are many areas of everyday life that can affect the health of you or your family members. The following questions are about any areas that make you feel worried or concerned.

(Please circle **one number per line**)

**The physical and/or emotional health of my family causes me...**

no concern    1        2        3        4        5        a lot of concern

**My access to health and other services is...**

good    1        2        3        4        5        poor

**The support I have from family and friends is...**

good    1        2        3        4        5        poor

**Employment/unemployment within the family causes me...**

no concern    1        2        3        4        5        a lot of concern

**Money causes me...**

no concern    1        2        3        4        5        a lot of concern

**Housing causes me...**

no concern    1        2        3        4        5        a lot of concern

**The use of tobacco, alcohol or other drugs within the household causes me...**

no concern    1        2        3        4        5        a lot of concern

**Stressful life events, e.g. childhood experiences, abuse, domestic violence, crime etc., cause me...**

no concern    1        2        3        4        5        a lot of concern

**Being a parent causes me...**

no concern    1        2        3        4        5        a lot of concern

**Do you have any other worries not covered above? (Please write in)**

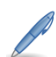



**47** The following questions have been designed so that you can show how you have been feeling in the past week. Don't take too long over replies; your immediate reaction to each statement will probably be more accurate than a long, thought-out response.

Read each statement and tick the box that **best** describes you.

**I feel tense or 'wound up'**

(Please tick **one box only**)

Most of the time  3

A lot of the time  2

From time to time, occasionally  1

Not at all  0

**I still enjoy the things I used to enjoy**

(Please tick **one box only**)

Definitely as much  0

Not quite so much  1

Only a little  2

Hardly at all  3

**I get a sort of frightened feeling as if something awful is about to happen**

(Please tick **one box only**)

Very definitely and quite badly  3

Yes, but not too badly  2

A little, but it doesn't worry me  1

Not at all  0

**I can laugh and see the funny side of things**

(Please tick **one box only**)

- As much as I always could  0
- Not quite so much now  1
- Definitely not so much now  2
- Not at all  3

**Worrying thoughts go through my mind**

(Please tick **one box only**)

- A great deal of the time  3
- A lot of the time  2
- Not too often  1
- Very little  0

**I feel cheerful**

(Please tick **one box only**)

- Never  3
- Not often  2
- Sometimes  1
- Most of the time  0

**I can sit at ease and feel relaxed**

(Please tick **one box only**)

- Definitely  0
- Usually  1
- Not often  2
- Not at all  3

**I feel as if I am slowed down**

(Please tick **one box only**)

- Nearly all the time  3
- Very often  2
- Sometimes  1
- Not at all  0

**I get a sort of frightened feeling like 'butterflies' in the stomach**

(Please tick **one box only**)

- Not at all  0
- Occasionally  1
- Quite often  2
- Very often  3

**I have lost interest in my appearance**

(Please tick **one box only**)

- Definitely  3
- I don't take as much care as I should  2
- I may not take quite as much care  1
- I take just as much care as ever  0

**I feel restless as if I have to be on the move**

(Please tick **one box only**)

- Very much indeed  3
- Quite a lot  2
- Not very much  1
- Not at all  0

**I look forward with enjoyment to things**

(Please tick **one box only**)

As much as I ever did  0

Rather less than I used to  1

Definitely less than I used to  2

Hardly at all  3

**I get sudden feelings of panic**

(Please tick **one box only**)

Very often indeed  3

Quite often  2

Not very often  1

Not at all  0

**I can enjoy a good book or radio or television programme**

(Please tick **one box only**)

Often  0

Sometimes  1

Not often  2

Very seldom  3

**I lose my temper and shout and snap at others**

(Please tick **one box only**)

Yes, definitely  3

Yes, sometimes  2

No, not much  1

No, not at all  0

**I feel I might lose control and hit or hurt someone**

(Please tick **one box only**)

Sometimes  3

Occasionally  2

Rarely  1

Never  0

**I am patient with other people**

(Please tick **one box only**)

All the time  0

Most of the time  1

Some of the time  2

Hardly ever  3

**People upset me so that I feel like slamming doors or banging about**

(Please tick **one box only**)

Yes, often  3

Yes, sometimes  2

Only occasionally  1

Not at all  0

**48** Below is a list of problems people sometimes have. Please read each one carefully and tick the box that best describes how much that problem has distressed or bothered you during the past 7 days, including today.  
 (Please tick **one** box per line)

| How much were you distressed by:                      | Not at all                 | A little bit               | Moderately                 | Quite a bit                | Extremely                  |
|-------------------------------------------------------|----------------------------|----------------------------|----------------------------|----------------------------|----------------------------|
| Nervousness or shakiness inside                       | <input type="checkbox"/> 0 | <input type="checkbox"/> 1 | <input type="checkbox"/> 2 | <input type="checkbox"/> 3 | <input type="checkbox"/> 4 |
| Faintness or dizziness                                | <input type="checkbox"/> 0 | <input type="checkbox"/> 1 | <input type="checkbox"/> 2 | <input type="checkbox"/> 3 | <input type="checkbox"/> 4 |
| The idea that someone else can control your thoughts  | <input type="checkbox"/> 0 | <input type="checkbox"/> 1 | <input type="checkbox"/> 2 | <input type="checkbox"/> 3 | <input type="checkbox"/> 4 |
| Feeling others are to blame for most of your troubles | <input type="checkbox"/> 0 | <input type="checkbox"/> 1 | <input type="checkbox"/> 2 | <input type="checkbox"/> 3 | <input type="checkbox"/> 4 |
| Trouble remembering things                            | <input type="checkbox"/> 0 | <input type="checkbox"/> 1 | <input type="checkbox"/> 2 | <input type="checkbox"/> 3 | <input type="checkbox"/> 4 |
| Feeling easily annoyed or irritated                   | <input type="checkbox"/> 0 | <input type="checkbox"/> 1 | <input type="checkbox"/> 2 | <input type="checkbox"/> 3 | <input type="checkbox"/> 4 |
| Pains in heart or chest                               | <input type="checkbox"/> 0 | <input type="checkbox"/> 1 | <input type="checkbox"/> 2 | <input type="checkbox"/> 3 | <input type="checkbox"/> 4 |
| Feeling afraid in open spaces or on the street        | <input type="checkbox"/> 0 | <input type="checkbox"/> 1 | <input type="checkbox"/> 2 | <input type="checkbox"/> 3 | <input type="checkbox"/> 4 |
| Thoughts of ending your life                          | <input type="checkbox"/> 0 | <input type="checkbox"/> 1 | <input type="checkbox"/> 2 | <input type="checkbox"/> 3 | <input type="checkbox"/> 4 |
| Feeling that most people cannot be trusted            | <input type="checkbox"/> 0 | <input type="checkbox"/> 1 | <input type="checkbox"/> 2 | <input type="checkbox"/> 3 | <input type="checkbox"/> 4 |
| Poor appetite                                         | <input type="checkbox"/> 0 | <input type="checkbox"/> 1 | <input type="checkbox"/> 2 | <input type="checkbox"/> 3 | <input type="checkbox"/> 4 |
| Being suddenly scared for no reason                   | <input type="checkbox"/> 0 | <input type="checkbox"/> 1 | <input type="checkbox"/> 2 | <input type="checkbox"/> 3 | <input type="checkbox"/> 4 |
| Temper outbursts that you could not control           | <input type="checkbox"/> 0 | <input type="checkbox"/> 1 | <input type="checkbox"/> 2 | <input type="checkbox"/> 3 | <input type="checkbox"/> 4 |
| Feeling lonely even when you are with people          | <input type="checkbox"/> 0 | <input type="checkbox"/> 1 | <input type="checkbox"/> 2 | <input type="checkbox"/> 3 | <input type="checkbox"/> 4 |
| Feeling blocked in getting things done                | <input type="checkbox"/> 0 | <input type="checkbox"/> 1 | <input type="checkbox"/> 2 | <input type="checkbox"/> 3 | <input type="checkbox"/> 4 |
| Feeling lonely                                        | <input type="checkbox"/> 0 | <input type="checkbox"/> 1 | <input type="checkbox"/> 2 | <input type="checkbox"/> 3 | <input type="checkbox"/> 4 |
| Feeling blue                                          | <input type="checkbox"/> 0 | <input type="checkbox"/> 1 | <input type="checkbox"/> 2 | <input type="checkbox"/> 3 | <input type="checkbox"/> 4 |

| How much were you distressed by:                                        | Not at all                 | A little bit               | Moderately                 | Quite a bit                | Extremely                  |
|-------------------------------------------------------------------------|----------------------------|----------------------------|----------------------------|----------------------------|----------------------------|
| Feeling no interest in things                                           | <input type="checkbox"/> 0 | <input type="checkbox"/> 1 | <input type="checkbox"/> 2 | <input type="checkbox"/> 3 | <input type="checkbox"/> 4 |
| Feeling fearful                                                         | <input type="checkbox"/> 0 | <input type="checkbox"/> 1 | <input type="checkbox"/> 2 | <input type="checkbox"/> 3 | <input type="checkbox"/> 4 |
| Your feelings being easily hurt                                         | <input type="checkbox"/> 0 | <input type="checkbox"/> 1 | <input type="checkbox"/> 2 | <input type="checkbox"/> 3 | <input type="checkbox"/> 4 |
| Feeling that people are unfriendly or dislike you                       | <input type="checkbox"/> 0 | <input type="checkbox"/> 1 | <input type="checkbox"/> 2 | <input type="checkbox"/> 3 | <input type="checkbox"/> 4 |
| Feeling inferior to others                                              | <input type="checkbox"/> 0 | <input type="checkbox"/> 1 | <input type="checkbox"/> 2 | <input type="checkbox"/> 3 | <input type="checkbox"/> 4 |
| Nausea or upset stomach                                                 | <input type="checkbox"/> 0 | <input type="checkbox"/> 1 | <input type="checkbox"/> 2 | <input type="checkbox"/> 3 | <input type="checkbox"/> 4 |
| Feeling that you are watched or talked about by others                  | <input type="checkbox"/> 0 | <input type="checkbox"/> 1 | <input type="checkbox"/> 2 | <input type="checkbox"/> 3 | <input type="checkbox"/> 4 |
| Trouble falling asleep                                                  | <input type="checkbox"/> 0 | <input type="checkbox"/> 1 | <input type="checkbox"/> 2 | <input type="checkbox"/> 3 | <input type="checkbox"/> 4 |
| Having to check and double-check what you do                            | <input type="checkbox"/> 0 | <input type="checkbox"/> 1 | <input type="checkbox"/> 2 | <input type="checkbox"/> 3 | <input type="checkbox"/> 4 |
| Difficulty making decisions                                             | <input type="checkbox"/> 0 | <input type="checkbox"/> 1 | <input type="checkbox"/> 2 | <input type="checkbox"/> 3 | <input type="checkbox"/> 4 |
| Feeling afraid to travel on buses, subways or trains                    | <input type="checkbox"/> 0 | <input type="checkbox"/> 1 | <input type="checkbox"/> 2 | <input type="checkbox"/> 3 | <input type="checkbox"/> 4 |
| Trouble getting your breath                                             | <input type="checkbox"/> 0 | <input type="checkbox"/> 1 | <input type="checkbox"/> 2 | <input type="checkbox"/> 3 | <input type="checkbox"/> 4 |
| Hot or cold spells                                                      | <input type="checkbox"/> 0 | <input type="checkbox"/> 1 | <input type="checkbox"/> 2 | <input type="checkbox"/> 3 | <input type="checkbox"/> 4 |
| Avoiding certain things, places or activities because they frighten you | <input type="checkbox"/> 0 | <input type="checkbox"/> 1 | <input type="checkbox"/> 2 | <input type="checkbox"/> 3 | <input type="checkbox"/> 4 |
| Your mind going blank                                                   | <input type="checkbox"/> 0 | <input type="checkbox"/> 1 | <input type="checkbox"/> 2 | <input type="checkbox"/> 3 | <input type="checkbox"/> 4 |
| Numbness or tingling in parts of your body                              | <input type="checkbox"/> 0 | <input type="checkbox"/> 1 | <input type="checkbox"/> 2 | <input type="checkbox"/> 3 | <input type="checkbox"/> 4 |
| The idea that you should be punished for your sins                      | <input type="checkbox"/> 0 | <input type="checkbox"/> 1 | <input type="checkbox"/> 2 | <input type="checkbox"/> 3 | <input type="checkbox"/> 4 |
| Feeling hopeless about the future                                       | <input type="checkbox"/> 0 | <input type="checkbox"/> 1 | <input type="checkbox"/> 2 | <input type="checkbox"/> 3 | <input type="checkbox"/> 4 |

| How much were you distressed by:                               | Not at all                 | A little bit               | Moderately                 | Quite a bit                | Extremely                  |
|----------------------------------------------------------------|----------------------------|----------------------------|----------------------------|----------------------------|----------------------------|
| Trouble concentrating                                          | <input type="checkbox"/> 0 | <input type="checkbox"/> 1 | <input type="checkbox"/> 2 | <input type="checkbox"/> 3 | <input type="checkbox"/> 4 |
| Feeling weak in parts of your body                             | <input type="checkbox"/> 0 | <input type="checkbox"/> 1 | <input type="checkbox"/> 2 | <input type="checkbox"/> 3 | <input type="checkbox"/> 4 |
| Feeling tense or keyed up                                      | <input type="checkbox"/> 0 | <input type="checkbox"/> 1 | <input type="checkbox"/> 2 | <input type="checkbox"/> 3 | <input type="checkbox"/> 4 |
| Thoughts of death or dying                                     | <input type="checkbox"/> 0 | <input type="checkbox"/> 1 | <input type="checkbox"/> 2 | <input type="checkbox"/> 3 | <input type="checkbox"/> 4 |
| Having urges to beat, injure or harm someone                   | <input type="checkbox"/> 0 | <input type="checkbox"/> 1 | <input type="checkbox"/> 2 | <input type="checkbox"/> 3 | <input type="checkbox"/> 4 |
| Having urges to break or smash things                          | <input type="checkbox"/> 0 | <input type="checkbox"/> 1 | <input type="checkbox"/> 2 | <input type="checkbox"/> 3 | <input type="checkbox"/> 4 |
| Feeling very self-conscious with others                        | <input type="checkbox"/> 0 | <input type="checkbox"/> 1 | <input type="checkbox"/> 2 | <input type="checkbox"/> 3 | <input type="checkbox"/> 4 |
| Feeling uneasy in crowds, such as shopping or at a movie       | <input type="checkbox"/> 0 | <input type="checkbox"/> 1 | <input type="checkbox"/> 2 | <input type="checkbox"/> 3 | <input type="checkbox"/> 4 |
| Never feeling close to another person                          | <input type="checkbox"/> 0 | <input type="checkbox"/> 1 | <input type="checkbox"/> 2 | <input type="checkbox"/> 3 | <input type="checkbox"/> 4 |
| Spells of terror or panic                                      | <input type="checkbox"/> 0 | <input type="checkbox"/> 1 | <input type="checkbox"/> 2 | <input type="checkbox"/> 3 | <input type="checkbox"/> 4 |
| Getting into frequent arguments                                | <input type="checkbox"/> 0 | <input type="checkbox"/> 1 | <input type="checkbox"/> 2 | <input type="checkbox"/> 3 | <input type="checkbox"/> 4 |
| Feeling nervous when you are left alone                        | <input type="checkbox"/> 0 | <input type="checkbox"/> 1 | <input type="checkbox"/> 2 | <input type="checkbox"/> 3 | <input type="checkbox"/> 4 |
| Others not giving you proper credit for your achievements      | <input type="checkbox"/> 0 | <input type="checkbox"/> 1 | <input type="checkbox"/> 2 | <input type="checkbox"/> 3 | <input type="checkbox"/> 4 |
| Feeling so restless you couldn't sit still                     | <input type="checkbox"/> 0 | <input type="checkbox"/> 1 | <input type="checkbox"/> 2 | <input type="checkbox"/> 3 | <input type="checkbox"/> 4 |
| Feelings of worthlessness                                      | <input type="checkbox"/> 0 | <input type="checkbox"/> 1 | <input type="checkbox"/> 2 | <input type="checkbox"/> 3 | <input type="checkbox"/> 4 |
| Feeling that people will take advantage of you if you let them | <input type="checkbox"/> 0 | <input type="checkbox"/> 1 | <input type="checkbox"/> 2 | <input type="checkbox"/> 3 | <input type="checkbox"/> 4 |
| Feelings of guilt                                              | <input type="checkbox"/> 0 | <input type="checkbox"/> 1 | <input type="checkbox"/> 2 | <input type="checkbox"/> 3 | <input type="checkbox"/> 4 |
| The idea that something is wrong with your mind                | <input type="checkbox"/> 0 | <input type="checkbox"/> 1 | <input type="checkbox"/> 2 | <input type="checkbox"/> 3 | <input type="checkbox"/> 4 |



49

By placing a tick in **one box in each group** below, please indicate which statements **best** describe your own health state today.

### Mobility

I have no problems in walking about  1

I have some problems in walking about  2

I am confined to bed  3

### Self-Care

I have no problems with self-care  1

I have some problems washing or dressing myself  2

I am unable to wash or dress myself  3

### Usual Activities (e.g. work, study, housework, family or leisure activities)

I have no problems with performing my usual activities  1

I have some problems with performing my usual activities  2

I am unable to perform my usual activities  3

### Pain/Discomfort

I have no pain or discomfort  1

I have moderate pain or discomfort  2

I have extreme pain or discomfort  3

### Anxiety/Depression

I am not anxious or depressed  1

I am moderately anxious or depressed  2

I am extremely anxious or depressed  3

**THIS IS AN EXAMPLE**

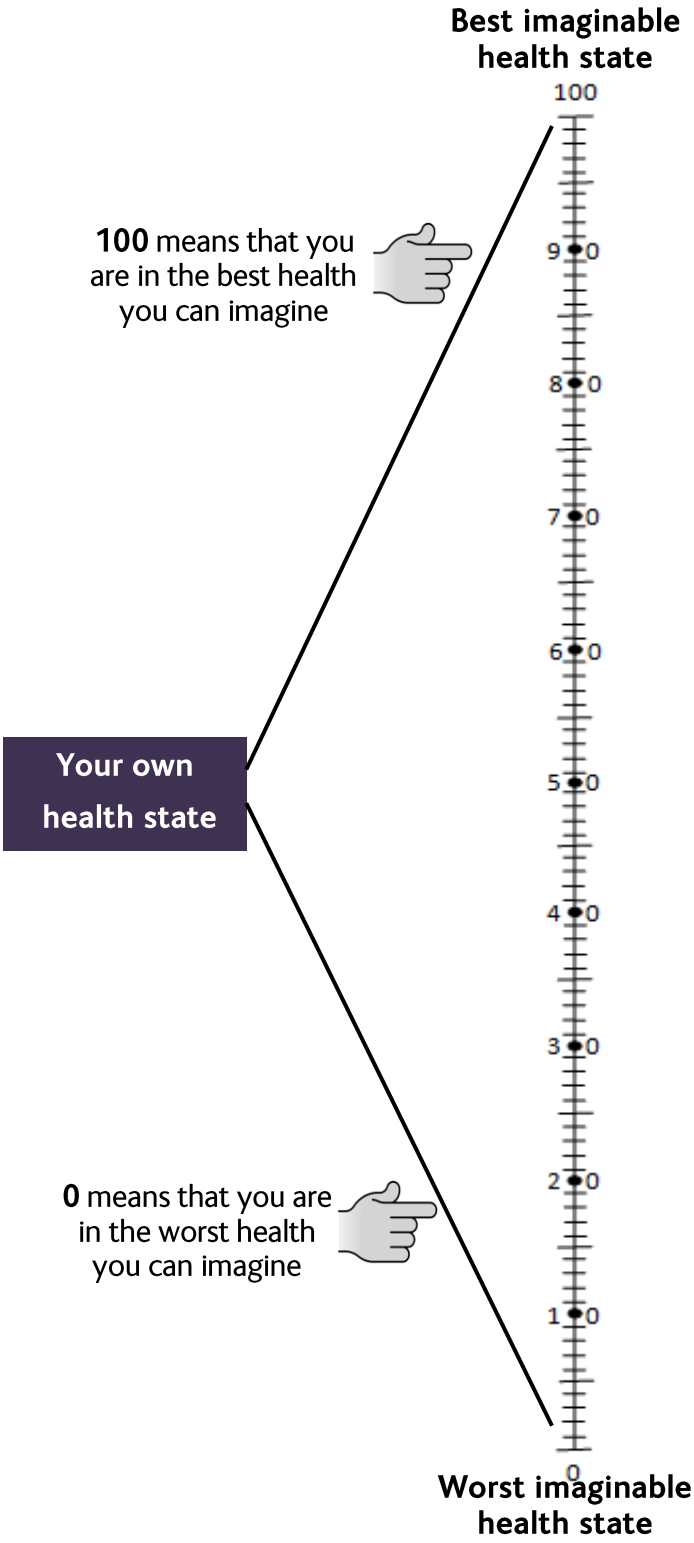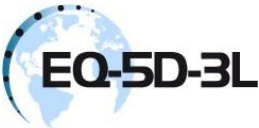

UK (English) © 1990 EuroQol Group EQ-5D™ is a trade mark of the EuroQol Gro

**50 NOW IT IS YOUR TURN**

To help people say how good or bad a health state is, we have drawn a scale (rather like a thermometer) on which the best state you can imagine is marked 100 and the worst state you can imagine is marked 0.

We would like you to indicate on this scale how good or bad your own health is today, in your opinion. Please do this by drawing a line from the box below to whichever point on the scale indicates how good or bad your health state is today.

**Your own health state**

**Best imaginable health state**

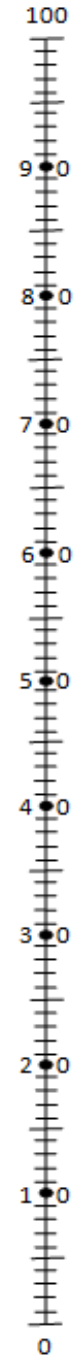

**Worst imaginable health state**

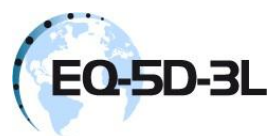

UK (English) © 1990 EuroQol Group EQ-5D™ is a trade mark of the EuroQol Gro

## Your support

|           |                                                                                                                                                                                                                                         |                            |
|-----------|-----------------------------------------------------------------------------------------------------------------------------------------------------------------------------------------------------------------------------------------|----------------------------|
| <b>51</b> | <b>During this pregnancy, who would help you if a problem came up?</b> (For example, who would help you if you needed to borrow £20 or if you got sick and had to be in bed for several weeks?)<br>(Please tick <b>all that apply</b> ) |                            |
|           | My husband or partner                                                                                                                                                                                                                   | <input type="checkbox"/> 1 |
|           | My mother, father, or in-laws                                                                                                                                                                                                           | <input type="checkbox"/> 1 |
|           | Other family member or relative                                                                                                                                                                                                         | <input type="checkbox"/> 1 |
|           | A friend                                                                                                                                                                                                                                | <input type="checkbox"/> 1 |
|           | Religious community (e.g. church, mosque)                                                                                                                                                                                               | <input type="checkbox"/> 1 |
|           | Someone else (please <b>write in</b> )                                                                                                                                                                                                  | <input type="checkbox"/> 1 |
|           | <br>_____                                                                                                                                            |                            |
|           | No one would help me                                                                                                                                                                                                                    | <input type="checkbox"/> 1 |

|           |                                                                                                                                                         |                            |                            |
|-----------|---------------------------------------------------------------------------------------------------------------------------------------------------------|----------------------------|----------------------------|
| <b>52</b> | <b>During this pregnancy, would you have the kinds of help listed below if you needed them?</b><br>(For each one, please tick <b>either Yes or No</b> ) |                            |                            |
|           |                                                                                                                                                         | <b>Yes</b>                 | <b>No</b>                  |
|           | Someone to loan me £20                                                                                                                                  | <input type="checkbox"/> 1 | <input type="checkbox"/> 2 |
|           | Someone to help me if I were sick and needed to be in bed                                                                                               | <input type="checkbox"/> 1 | <input type="checkbox"/> 2 |
|           | Someone to take me to the clinic or doctor's surgery if I needed a lift                                                                                 | <input type="checkbox"/> 1 | <input type="checkbox"/> 2 |
|           | Someone to talk with about my problems                                                                                                                  | <input type="checkbox"/> 1 | <input type="checkbox"/> 2 |

## Your partner

**53** Are you currently in a relationship?  
(Please tick **one box only**)

Yes  <sub>1</sub> **Go to Question 54**

No  <sub>2</sub> **Which of the following best describes you? (Please tick one box only)**

I am single/never married  <sub>3</sub>

I am divorced  <sub>4</sub>

I am separated  <sub>5</sub>

I am widowed  <sub>6</sub>

**Now go to Question 71**

**54** Which statement best describes you?  
(Please tick **one box only**)

I am married/in a civil partnership  <sub>1</sub>

I live with someone as a couple but we are not married/in a civil partnership  <sub>2</sub>

I am in a relationship but we do not live together as a couple  <sub>3</sub>

**55** How old is your partner?  
(Please **write in**, if you don't know, please write in your best guess)

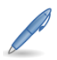

\_\_\_\_\_ Years old

**56** Is your partner male or female?  
(Please tick **one box only**)

Male  <sub>1</sub>

Female  <sub>2</sub>

|           |                                                                                                                                    |
|-----------|------------------------------------------------------------------------------------------------------------------------------------|
| <b>57</b> | <b>Is this your first pregnancy with your partner?</b><br>(Please tick <b>one box only</b> )                                       |
|           | <p style="text-align: center;">Yes <input type="checkbox"/> 1</p> <p style="text-align: center;">No <input type="checkbox"/> 2</p> |

|           |                                                                                                                                                                                                                                                                                                                                                                                                                                                                                                                                                                                                                                                                                                                                                                                                                                                                                                                     |                                                                                                                                                                                                                                                                                                                                                                                                                                                                                                                                                                                                                                                                                                                                                                                                                                                                                                                                                                                                                                                                                                                                            |
|-----------|---------------------------------------------------------------------------------------------------------------------------------------------------------------------------------------------------------------------------------------------------------------------------------------------------------------------------------------------------------------------------------------------------------------------------------------------------------------------------------------------------------------------------------------------------------------------------------------------------------------------------------------------------------------------------------------------------------------------------------------------------------------------------------------------------------------------------------------------------------------------------------------------------------------------|--------------------------------------------------------------------------------------------------------------------------------------------------------------------------------------------------------------------------------------------------------------------------------------------------------------------------------------------------------------------------------------------------------------------------------------------------------------------------------------------------------------------------------------------------------------------------------------------------------------------------------------------------------------------------------------------------------------------------------------------------------------------------------------------------------------------------------------------------------------------------------------------------------------------------------------------------------------------------------------------------------------------------------------------------------------------------------------------------------------------------------------------|
| <b>58</b> | <b>Which ethnic background does your partner belong to?</b><br>(Please tick <b>all that apply</b> )                                                                                                                                                                                                                                                                                                                                                                                                                                                                                                                                                                                                                                                                                                                                                                                                                 |                                                                                                                                                                                                                                                                                                                                                                                                                                                                                                                                                                                                                                                                                                                                                                                                                                                                                                                                                                                                                                                                                                                                            |
|           | <p style="text-align: center;"><b>White</b></p> <p style="text-align: center;">Scottish <input type="checkbox"/> 1</p> <p style="text-align: center;">British <input type="checkbox"/> 1</p> <p style="text-align: center;">English <input type="checkbox"/> 1</p> <p style="text-align: center;">Irish <input type="checkbox"/> 1</p> <p style="text-align: center;">Northern Irish <input type="checkbox"/> 1</p> <p style="text-align: center;">Welsh <input type="checkbox"/> 1</p> <p style="text-align: center;">Any other White background<br/>(Please <b>write in</b>) <input type="checkbox"/> 1</p> <hr style="border: 0; border-top: 1px solid black; margin: 5px 0;"/> <p style="text-align: center;"></p> <p style="text-align: center;"><b>I don't know their ethnic background</b> <input type="checkbox"/> 1</p> | <p style="text-align: center;"><b>Asian or Asian British</b></p> <p style="text-align: center;">Bangladeshi <input type="checkbox"/> 1</p> <p style="text-align: center;">Indian <input type="checkbox"/> 1</p> <p style="text-align: center;">Pakistani <input type="checkbox"/> 1</p> <p style="text-align: center;">Any other Asian background<br/>(Please <b>write in</b>) <input type="checkbox"/> 1</p> <hr style="border: 0; border-top: 1px solid black; margin: 5px 0;"/> <p style="text-align: center;"></p> <p style="text-align: center;"><b>Black or Black British</b></p> <p style="text-align: center;">African <input type="checkbox"/> 1</p> <p style="text-align: center;">Caribbean <input type="checkbox"/> 1</p> <p style="text-align: center;">Any other Black background<br/>(Please <b>write in</b>) <input type="checkbox"/> 1</p> <hr style="border: 0; border-top: 1px solid black; margin: 5px 0;"/> <p style="text-align: center;"></p> |

|                                                                                                                                                                                                                                                                                                                                                                                          |                                                                                                     |
|------------------------------------------------------------------------------------------------------------------------------------------------------------------------------------------------------------------------------------------------------------------------------------------------------------------------------------------------------------------------------------------|-----------------------------------------------------------------------------------------------------|
| <b>59</b>                                                                                                                                                                                                                                                                                                                                                                                | <b>Which of these statements best describes your partner?</b><br>(Please tick <b>one box only</b> ) |
| <p>They are currently in paid employment or self-employed <input type="checkbox"/> <sub>1</sub> <b>Go to Question 60</b></p> <p>They are not currently working but have had paid employment in the past <input type="checkbox"/> <sub>2</sub> <b>Go to Question 61</b></p> <p>They have never been in paid employment <input type="checkbox"/> <sub>3</sub> <b>Go to Question 64</b></p> |                                                                                                     |

|                                                                                               |                                                                                                                                 |
|-----------------------------------------------------------------------------------------------|---------------------------------------------------------------------------------------------------------------------------------|
| <b>60</b>                                                                                     | <b>How many hours did they work last week?</b><br>(Please <b>write in</b> , if you don't know, please write in your best guess) |
|  _____ Hours |                                                                                                                                 |

|           |                                                                                                                       |                                                                                     |
|-----------|-----------------------------------------------------------------------------------------------------------------------|-------------------------------------------------------------------------------------|
| <b>61</b> | <b>Please tell us about their current job or their last job if they are not working.</b><br>(Please <b>write in</b> ) |                                                                                     |
|           | <b>Job title</b><br>Example: waiter                                                                                   |  |
|           | <b>What this actually involves</b><br>Example: taking food orders, serving customers food and drink                   |  |
|           | <b>Employer type</b><br>Example: restaurant                                                                           |  |

|                                                                                                                                                                                                                                                                                                                                                                                             |                                                                                                                                             |  |
|---------------------------------------------------------------------------------------------------------------------------------------------------------------------------------------------------------------------------------------------------------------------------------------------------------------------------------------------------------------------------------------------|---------------------------------------------------------------------------------------------------------------------------------------------|--|
| <b>62</b>                                                                                                                                                                                                                                                                                                                                                                                   | <b>Which of these best describes their current job or their last job if they are not working now?</b><br>(Please tick <b>one box only</b> ) |  |
| <p>Self employed with paid employees <input type="checkbox"/> <sub>1</sub></p> <p>Self employed with NO paid employees <input type="checkbox"/> <sub>2</sub></p> <p>Manager <input type="checkbox"/> <sub>3</sub></p> <p>Supervisor <input type="checkbox"/> <sub>4</sub></p> <p>Employee <input type="checkbox"/> <sub>5</sub></p> <p>Don't know <input type="checkbox"/> <sub>6</sub></p> |                                                                                                                                             |  |

| <b>63</b> | <b>What size of company is/was it?</b><br>(Please tick <b>one box only</b> ) |
|-----------|------------------------------------------------------------------------------|
|           | Under 25 staff <input type="checkbox"/> 1                                    |
|           | 25 staff or more <input type="checkbox"/> 2                                  |
|           | Don't know <input type="checkbox"/> 3                                        |

| <b>64</b>                                                                                                                                                                                                                            | <b>Which describes best what your partner was doing last week?</b><br>(Please tick <b>one box only</b> ) |
|--------------------------------------------------------------------------------------------------------------------------------------------------------------------------------------------------------------------------------------|----------------------------------------------------------------------------------------------------------|
|                                                                                                                                                                                                                                      | In paid employment <input type="checkbox"/> 1                                                            |
|                                                                                                                                                                                                                                      | Doing unpaid work for a business that they own or that a relative owns <input type="checkbox"/> 2        |
|                                                                                                                                                                                                                                      | Waiting to take up paid work already obtained <input type="checkbox"/> 3                                 |
|                                                                                                                                                                                                                                      | On a Government scheme for employment training <input type="checkbox"/> 4                                |
|                                                                                                                                                                                                                                      | Looking for paid work on a Government training scheme <input type="checkbox"/> 5                         |
|                                                                                                                                                                                                                                      | Intending to look for work but prevented by temporary sickness or illness <input type="checkbox"/> 6     |
|                                                                                                                                                                                                                                      | Permanently unable to work because of long-term sickness or disability <input type="checkbox"/> 7        |
|                                                                                                                                                                                                                                      | At college or university full time <input type="checkbox"/> 8                                            |
|                                                                                                                                                                                                                                      | At college or university part time <input type="checkbox"/> 9                                            |
|                                                                                                                                                                                                                                      | In full time secondary education (e.g. attending high school) <input type="checkbox"/> 10                |
|                                                                                                                                                                                                                                      | Retired from paid work <input type="checkbox"/> 11                                                       |
|                                                                                                                                                                                                                                      | Looking after home or family <input type="checkbox"/> 12                                                 |
|                                                                                                                                                                                                                                      | Providing full time care for an ill or disabled friend or relative <input type="checkbox"/> 13           |
|                                                                                                                                                                                                                                      | Doing something else (please <b>write in</b> ) <input type="checkbox"/> 14                               |
| <br><hr style="border: 0; border-top: 1px solid black; margin-top: 5px;"/> <hr style="border: 0; border-top: 1px solid black; margin-top: 5px;"/> |                                                                                                          |



|           |                                                                                                                               |           |            |
|-----------|-------------------------------------------------------------------------------------------------------------------------------|-----------|------------|
| <b>65</b> | <b>Which of the following describes how your partner feels about the pregnancy?</b><br>(Please circle <b>all that apply</b> ) |           |            |
|           | Protected                                                                                                                     | Unsure    | Happy      |
|           | Not bothered                                                                                                                  | Excited   | Anxious    |
|           | Resentful                                                                                                                     | Irritable | Relaxed    |
|           | Loving                                                                                                                        | Worried   | Supported  |
|           | Angry                                                                                                                         | Confused  | Calm       |
|           | Don't care                                                                                                                    | Unhappy   | Protective |
|           | Laid-back                                                                                                                     | Serious   | Proud      |
|           | Scared                                                                                                                        | Caring    | Nervous    |
|           | Strong                                                                                                                        | Other     | Weak       |
|           | ↓                                                                                                                             |           |            |
|           | _____                                                                                                                         |           |            |
|           | (Please <b>write in</b> )                                                                                                     |           |            |

|           |                                                                                                                                        |                                       |                                       |                                       |
|-----------|----------------------------------------------------------------------------------------------------------------------------------------|---------------------------------------|---------------------------------------|---------------------------------------|
| <b>66</b> | <b>How involved do you think your partner will be in your pregnancy and the baby's life?</b><br>(Please tick <b>one box per line</b> ) |                                       |                                       |                                       |
|           |                                                                                                                                        | <b>Yes</b>                            | <b>Maybe</b>                          | <b>No</b>                             |
|           | He/she will come to antenatal scans and appointments with me                                                                           | <input type="checkbox"/> 1            | <input type="checkbox"/> 2            | <input type="checkbox"/> 3            |
|           | He/she will come to antenatal classes with me                                                                                          | <input checked="" type="checkbox"/> 1 | <input checked="" type="checkbox"/> 2 | <input checked="" type="checkbox"/> 3 |
|           | He/she will attend the birth                                                                                                           | <input type="checkbox"/> 1            | <input type="checkbox"/> 2            | <input type="checkbox"/> 3            |
|           | He/she will help me prepare for my baby's arrival                                                                                      | <input checked="" type="checkbox"/> 1 | <input checked="" type="checkbox"/> 2 | <input checked="" type="checkbox"/> 3 |
|           | He/she will support my baby financially                                                                                                | <input type="checkbox"/> 1            | <input type="checkbox"/> 2            | <input type="checkbox"/> 3            |
|           | He/she will be emotionally involved in my baby's life                                                                                  | <input checked="" type="checkbox"/> 1 | <input checked="" type="checkbox"/> 2 | <input checked="" type="checkbox"/> 3 |
|           | He/she will see my baby as often as he/she can                                                                                         | <input type="checkbox"/> 1            | <input type="checkbox"/> 2            | <input type="checkbox"/> 3            |
|           | He/she will be involved in my baby's upbringing                                                                                        | <input checked="" type="checkbox"/> 1 | <input checked="" type="checkbox"/> 2 | <input checked="" type="checkbox"/> 3 |

67

I am unable to see or speak to my partner every day because...  
(Please tick **one box per line**)

|                                                                                                                                    | Yes                        | No                         |
|------------------------------------------------------------------------------------------------------------------------------------|----------------------------|----------------------------|
| he/she is currently living or working abroad                                                                                       | <input type="checkbox"/> 1 | <input type="checkbox"/> 2 |
| he/she is a serving member of the armed forces and deployed overseas                                                               | <input type="checkbox"/> 1 | <input type="checkbox"/> 2 |
| we do not live at the same address                                                                                                 | <input type="checkbox"/> 1 | <input type="checkbox"/> 2 |
| I do not want to have contact with him/her                                                                                         | <input type="checkbox"/> 1 | <input type="checkbox"/> 2 |
| my family do not want me having contact with him/her                                                                               | <input type="checkbox"/> 1 | <input type="checkbox"/> 2 |
| he/she is in prison                                                                                                                | <input type="checkbox"/> 1 | <input type="checkbox"/> 2 |
| I have been told by a health or social care professional that if I have contact with him/her I will not be allowed to keep my baby | <input type="checkbox"/> 1 | <input type="checkbox"/> 2 |
| he/she was physically abusive towards me                                                                                           | <input type="checkbox"/> 1 | <input type="checkbox"/> 2 |
| other (please <b>write in</b> )                                                                                                    | <input type="checkbox"/> 1 | <input type="checkbox"/> 2 |

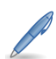

---

---

|                                                                                              |                                                                                                                                                                                                                         |                            |                            |                            |
|----------------------------------------------------------------------------------------------|-------------------------------------------------------------------------------------------------------------------------------------------------------------------------------------------------------------------------|----------------------------|----------------------------|----------------------------|
| <b>68</b>                                                                                    | <b>The following questions are about how you have been feeling during the past month. If you have not thought about these issues during the past month, please answer the questions based on your present feelings.</b> |                            |                            |                            |
|                                                                                              | <b>(Please tick one box per line)</b>                                                                                                                                                                                   |                            |                            |                            |
|                                                                                              | <b>Never</b>                                                                                                                                                                                                            | <b>Rarely</b>              | <b>Often</b>               | <b>Very much</b>           |
| Has there been tension between you and your partner – irritability, unpleasant silence, etc? | <input type="checkbox"/> 1                                                                                                                                                                                              | <input type="checkbox"/> 2 | <input type="checkbox"/> 3 | <input type="checkbox"/> 4 |
| Has your partner tried to share your interests?                                              | <input type="checkbox"/> 1                                                                                                                                                                                              | <input type="checkbox"/> 2 | <input type="checkbox"/> 3 | <input type="checkbox"/> 4 |
| Have you felt your partner went out too often without you?                                   | <input type="checkbox"/> 1                                                                                                                                                                                              | <input type="checkbox"/> 2 | <input type="checkbox"/> 3 | <input type="checkbox"/> 4 |
| Have you been feeling close to your partner since you became pregnant?                       | <input type="checkbox"/> 1                                                                                                                                                                                              | <input type="checkbox"/> 2 | <input type="checkbox"/> 3 | <input type="checkbox"/> 4 |
| Does your partner show their approval of you?                                                | <input type="checkbox"/> 1                                                                                                                                                                                              | <input type="checkbox"/> 2 | <input type="checkbox"/> 3 | <input type="checkbox"/> 4 |
|                                                                                              | <b>Very much</b>                                                                                                                                                                                                        | <b>A lot</b>               | <b>A little</b>            | <b>Not at all</b>          |
| Has your partner helped in the running of the house?                                         | <input type="checkbox"/> 4                                                                                                                                                                                              | <input type="checkbox"/> 3 | <input type="checkbox"/> 2 | <input type="checkbox"/> 1 |
| Have you felt like putting your arms round your partner and cuddling him/her?                | <input type="checkbox"/> 4                                                                                                                                                                                              | <input type="checkbox"/> 3 | <input type="checkbox"/> 2 | <input type="checkbox"/> 1 |
| Do you enjoy spending time with your partner?                                                | <input type="checkbox"/> 4                                                                                                                                                                                              | <input type="checkbox"/> 3 | <input type="checkbox"/> 2 | <input type="checkbox"/> 1 |
|                                                                                              | <b>Very often</b>                                                                                                                                                                                                       | <b>Often</b>               | <b>Rarely</b>              | <b>Never</b>               |
| Have arguments between you and your partner come close to blows?                             | <input type="checkbox"/> 4                                                                                                                                                                                              | <input type="checkbox"/> 3 | <input type="checkbox"/> 2 | <input type="checkbox"/> 1 |
| Have you found it easy to show affection to your partner?                                    | <input type="checkbox"/> 4                                                                                                                                                                                              | <input type="checkbox"/> 3 | <input type="checkbox"/> 2 | <input type="checkbox"/> 1 |
| Have you felt that your partner was paying you too little attention?                         | <input type="checkbox"/> 4                                                                                                                                                                                              | <input type="checkbox"/> 3 | <input type="checkbox"/> 2 | <input type="checkbox"/> 1 |
| Has your partner seemed to ignore how you were feeling?                                      | <input type="checkbox"/> 4                                                                                                                                                                                              | <input type="checkbox"/> 3 | <input type="checkbox"/> 2 | <input type="checkbox"/> 1 |
| Has your partner shown affection to you?                                                     | <input type="checkbox"/> 4                                                                                                                                                                                              | <input type="checkbox"/> 3 | <input type="checkbox"/> 2 | <input type="checkbox"/> 1 |
| Have you wished you could rely more on your partner to look after you?                       | <input type="checkbox"/> 4                                                                                                                                                                                              | <input type="checkbox"/> 3 | <input type="checkbox"/> 2 | <input type="checkbox"/> 1 |
| Does your partner talk to you about his/her problems and feelings?                           | <input type="checkbox"/> 4                                                                                                                                                                                              | <input type="checkbox"/> 3 | <input type="checkbox"/> 2 | <input type="checkbox"/> 1 |

| 69                                                                                             | Does your partner...<br>(Please tick <b>one box per line</b> ) |                            |                            |
|------------------------------------------------------------------------------------------------|----------------------------------------------------------------|----------------------------|----------------------------|
|                                                                                                | Yes                                                            | No                         | Don't know                 |
| smoke cigarettes/cigars?                                                                       | <input type="checkbox"/> 1                                     | <input type="checkbox"/> 2 | <input type="checkbox"/> 3 |
| smoke cannabis?                                                                                | <input type="checkbox"/> 1                                     | <input type="checkbox"/> 2 | <input type="checkbox"/> 3 |
| use illegal (street) drugs? e.g. heroin, crack/cocaine,<br>valium, ecstasy                     | <input type="checkbox"/> 1                                     | <input type="checkbox"/> 2 | <input type="checkbox"/> 3 |
| inject illegal (street) drugs? e.g. heroin, crack/cocaine,<br>temazepam                        | <input type="checkbox"/> 1                                     | <input type="checkbox"/> 2 | <input type="checkbox"/> 3 |
| take prescribed opiate substitute drugs? e.g. methadone<br>or buprenorphine (Subutex/Suboxone) | <input type="checkbox"/> 1                                     | <input type="checkbox"/> 2 | <input type="checkbox"/> 3 |
| receive help from services for his/her alcohol use?                                            | <input type="checkbox"/> 1                                     | <input type="checkbox"/> 2 | <input type="checkbox"/> 3 |
| receive help from services for his/her drug use?                                               | <input type="checkbox"/> 1                                     | <input type="checkbox"/> 2 | <input type="checkbox"/> 3 |

| 70       | Is your partner the father of your unborn child?<br>(Please tick <b>one box only</b> ) |                          |
|----------|----------------------------------------------------------------------------------------|--------------------------|
| Yes      | <input type="checkbox"/> 1                                                             | <b>Go to Question 85</b> |
| No       | <input type="checkbox"/> 2                                                             | <b>Go to Question 71</b> |
| Not sure | <input type="checkbox"/> 3                                                             | <b>Go to Question 85</b> |

The father of your baby

|           |                                                                                                                   |
|-----------|-------------------------------------------------------------------------------------------------------------------|
| <b>71</b> | <b>Have you told the father of your unborn child that you are pregnant?</b><br>(Please tick <b>one box only</b> ) |
|           | Yes <input type="checkbox"/> <sub>1</sub>                                                                         |
|           | No <input type="checkbox"/> <sub>2</sub> <b>Go to Question 85</b>                                                 |
|           | I'm not sure who the father is <input type="checkbox"/> <b>Go to Question 85</b>                                  |

|           |                                                                                                                 |
|-----------|-----------------------------------------------------------------------------------------------------------------|
| <b>72</b> | <b>Is this your first pregnancy with the father of your unborn child?</b><br>(Please tick <b>one box only</b> ) |
|           | Yes <input type="checkbox"/> <sub>1</sub>                                                                       |
|           | No <input type="checkbox"/> <sub>2</sub>                                                                        |

|           |                                                                                                                                     |
|-----------|-------------------------------------------------------------------------------------------------------------------------------------|
| <b>73</b> | <b>How old is the father of your unborn child?</b><br>(Please <b>write in</b> , if you don't know, please write in your best guess) |
|           |  _____ Years old                                 |

|           |                                                                                                                                          |           |            |
|-----------|------------------------------------------------------------------------------------------------------------------------------------------|-----------|------------|
| <b>74</b> | <b>Which of the following describes how the father of your baby feels about the pregnancy?</b><br>(Please circle <b>all that apply</b> ) |           |            |
|           | Protected                                                                                                                                | Unsure    | Happy      |
|           | Not bothered                                                                                                                             | Excited   | Anxious    |
|           | Resentful                                                                                                                                | Irritable | Relaxed    |
|           | Loving                                                                                                                                   | Worried   | Supported  |
|           | Angry                                                                                                                                    | Confused  | Calm       |
|           | Don't care                                                                                                                               | Unhappy   | Protective |
|           | Laid-back                                                                                                                                | Serious   | Proud      |
|           | Scared                                                                                                                                   | Caring    | Nervous    |
|           | Strong                                                                                                                                   | Other     | Weak       |
|           | ↓                                                                                                                                        |           |            |
|           | _____                                                                                                                                    |           |            |
|           | (Please <b>write in</b> )                                                                                                                |           |            |

|           |                                                                                                                        |                            |
|-----------|------------------------------------------------------------------------------------------------------------------------|----------------------------|
| <b>75</b> | <b>How often do you usually see or speak to the father of your unborn child?</b><br>(Please tick <b>one box only</b> ) |                            |
|           | Not at all                                                                                                             | <input type="checkbox"/> 1 |
|           | Less than once a month                                                                                                 | <input type="checkbox"/> 2 |
|           | 1 – 2 times a month                                                                                                    | <input type="checkbox"/> 3 |
|           | About once a week                                                                                                      | <input type="checkbox"/> 4 |
|           | Most days                                                                                                              | <input type="checkbox"/> 5 |
|           | Every day                                                                                                              | <input type="checkbox"/> 6 |

76

I am unable to see or speak to the father of my baby every day because...  
(Please tick **one box per line**)

|                                                                                                                                | Yes                        | No                         |
|--------------------------------------------------------------------------------------------------------------------------------|----------------------------|----------------------------|
| he is currently living or working abroad                                                                                       | <input type="checkbox"/> 1 | <input type="checkbox"/> 2 |
| he is a serving member of the armed forces and deployed overseas                                                               | <input type="checkbox"/> 1 | <input type="checkbox"/> 2 |
| we do not live at the same address                                                                                             | <input type="checkbox"/> 1 | <input type="checkbox"/> 2 |
| I do not want to have contact with him                                                                                         | <input type="checkbox"/> 1 | <input type="checkbox"/> 2 |
| my family do not want me having contact with him                                                                               | <input type="checkbox"/> 1 | <input type="checkbox"/> 2 |
| he is in prison                                                                                                                | <input type="checkbox"/> 1 | <input type="checkbox"/> 2 |
| I have been told by a health or social care professional that if I have contact with him I will not be allowed to keep my baby | <input type="checkbox"/> 1 | <input type="checkbox"/> 2 |
| he was physically abusive towards me                                                                                           | <input type="checkbox"/> 1 | <input type="checkbox"/> 2 |
| other (please <b>write in</b> )                                                                                                | <input type="checkbox"/> 1 | <input type="checkbox"/> 2 |

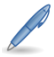

---

---

| 77 How involved do you think the father of your unborn child will be in your baby's life?<br>(Please tick <b>one box per line</b> ) |                                       |                                       |                                       |
|-------------------------------------------------------------------------------------------------------------------------------------|---------------------------------------|---------------------------------------|---------------------------------------|
|                                                                                                                                     | Yes                                   | Maybe                                 | No                                    |
| He will come to antenatal scans and appointments with me                                                                            | <input type="checkbox"/> 1            | <input type="checkbox"/> 2            | <input type="checkbox"/> 3            |
| He will come to antenatal classes with me                                                                                           | <input checked="" type="checkbox"/> 1 | <input checked="" type="checkbox"/> 2 | <input checked="" type="checkbox"/> 3 |
| He will attend the birth                                                                                                            | <input type="checkbox"/> 1            | <input type="checkbox"/> 2            | <input type="checkbox"/> 3            |
| He will help me prepare for my baby's arrival                                                                                       | <input checked="" type="checkbox"/> 1 | <input checked="" type="checkbox"/> 2 | <input checked="" type="checkbox"/> 3 |
| He will support my baby financially                                                                                                 | <input type="checkbox"/> 1            | <input type="checkbox"/> 2            | <input type="checkbox"/> 3            |
| He will be emotionally involved in my baby's life                                                                                   | <input checked="" type="checkbox"/> 1 | <input checked="" type="checkbox"/> 2 | <input checked="" type="checkbox"/> 3 |
| He will see my baby as often as he can                                                                                              | <input type="checkbox"/> 1            | <input type="checkbox"/> 2            | <input type="checkbox"/> 3            |
| He will be involved in my baby's upbringing                                                                                         | <input checked="" type="checkbox"/> 1 | <input checked="" type="checkbox"/> 2 | <input checked="" type="checkbox"/> 3 |

| 78 Does the father of your baby...<br>(Please tick <b>one box per line</b> )                |                                       |                                       |                                       |
|---------------------------------------------------------------------------------------------|---------------------------------------|---------------------------------------|---------------------------------------|
|                                                                                             | Yes                                   | No                                    | Don't know                            |
| smoke cigarettes/cigars?                                                                    | <input type="checkbox"/> 1            | <input type="checkbox"/> 2            | <input type="checkbox"/> 3            |
| smoke cannabis?                                                                             | <input checked="" type="checkbox"/> 1 | <input checked="" type="checkbox"/> 2 | <input checked="" type="checkbox"/> 3 |
| use illegal (street) drugs? e.g. heroin, crack/cocaine, valium, ecstasy                     | <input type="checkbox"/> 1            | <input type="checkbox"/> 2            | <input type="checkbox"/> 3            |
| inject illegal (street) drugs? e.g. heroin, crack/cocaine, temazepam                        | <input checked="" type="checkbox"/> 1 | <input checked="" type="checkbox"/> 2 | <input checked="" type="checkbox"/> 3 |
| take prescribed opiate substitute drugs? e.g. methadone or buprenorphine (Subutex/Suboxone) | <input type="checkbox"/> 1            | <input type="checkbox"/> 2            | <input type="checkbox"/> 3            |
| receive help from services for his alcohol use?                                             | <input checked="" type="checkbox"/> 1 | <input checked="" type="checkbox"/> 2 | <input checked="" type="checkbox"/> 3 |
| receive help from services for his drug use?                                                | <input type="checkbox"/> 1            | <input type="checkbox"/> 2            | <input type="checkbox"/> 3            |



|                                                                         |                                                                                                                |
|-------------------------------------------------------------------------|----------------------------------------------------------------------------------------------------------------|
| <b>79</b>                                                               | <b>Which of these statements best describes the father of your baby?</b><br>(Please tick <b>one box only</b> ) |
| They are currently in paid employment or self-employed                  | <input type="checkbox"/> <sub>1</sub> <b>Go to Question 80</b>                                                 |
| They are not currently working but have had paid employment in the past | <input type="checkbox"/> <sub>2</sub> <b>Go to Question 81</b>                                                 |
| They have never been in paid employment                                 | <input type="checkbox"/> <sub>3</sub> <b>Go to Question 84</b>                                                 |

|                                                                                   |                                                                                                                                 |
|-----------------------------------------------------------------------------------|---------------------------------------------------------------------------------------------------------------------------------|
| <b>80</b>                                                                         | <b>How many hours did they work last week?</b><br>(Please <b>write in</b> , if you don't know, please write in your best guess) |
|  | _____ Hours                                                                                                                     |

|                                                                                                     |                                                                                                                       |
|-----------------------------------------------------------------------------------------------------|-----------------------------------------------------------------------------------------------------------------------|
| <b>81</b>                                                                                           | <b>Please tell us about their current job or their last job if they are not working.</b><br>(Please <b>write in</b> ) |
| <b>Job title</b><br>Example: waiter                                                                 |                                      |
| <b>What this actually involves</b><br>Example: taking food orders, serving customers food and drink |                                    |
| <b>Employer type</b><br>Example: restaurant                                                         |                                    |

|                                      |                                                                                                                                             |
|--------------------------------------|---------------------------------------------------------------------------------------------------------------------------------------------|
| <b>82</b>                            | <b>Which of these best describes their current job or their last job if they are not working now?</b><br>(Please tick <b>one box only</b> ) |
| Self employed with paid employees    | <input type="checkbox"/> <sub>1</sub>                                                                                                       |
| Self employed with NO paid employees | <input type="checkbox"/> <sub>2</sub>                                                                                                       |
| Manager                              | <input type="checkbox"/> <sub>3</sub>                                                                                                       |
| Supervisor                           | <input type="checkbox"/> <sub>4</sub>                                                                                                       |
| Employee                             | <input type="checkbox"/> <sub>5</sub>                                                                                                       |
| Don't know                           | <input type="checkbox"/> <sub>6</sub>                                                                                                       |

|           |                                                                                                                                                  |
|-----------|--------------------------------------------------------------------------------------------------------------------------------------------------|
| <b>83</b> | <b>What size of company is/was it?</b><br>(Please tick <b>one box only</b> )                                                                     |
|           | <p>Under 25 staff <input type="checkbox"/> 1</p> <p>25 staff or more <input type="checkbox"/> 2</p> <p>Don't know <input type="checkbox"/> 3</p> |

|           |                                                                                                                                                                                                                                                                                                                                                                                                                                                                                                                                                                                                                                                                                                                                                                                                                                                                                                                                                                                                                                                                                                                                                                                                                                                                                                                                                                                                                                                                                                                                                                                                                                                                     |
|-----------|---------------------------------------------------------------------------------------------------------------------------------------------------------------------------------------------------------------------------------------------------------------------------------------------------------------------------------------------------------------------------------------------------------------------------------------------------------------------------------------------------------------------------------------------------------------------------------------------------------------------------------------------------------------------------------------------------------------------------------------------------------------------------------------------------------------------------------------------------------------------------------------------------------------------------------------------------------------------------------------------------------------------------------------------------------------------------------------------------------------------------------------------------------------------------------------------------------------------------------------------------------------------------------------------------------------------------------------------------------------------------------------------------------------------------------------------------------------------------------------------------------------------------------------------------------------------------------------------------------------------------------------------------------------------|
| <b>84</b> | <b>Which describes best what the father of your baby was doing last week?</b><br>(Please tick <b>one box only</b> )                                                                                                                                                                                                                                                                                                                                                                                                                                                                                                                                                                                                                                                                                                                                                                                                                                                                                                                                                                                                                                                                                                                                                                                                                                                                                                                                                                                                                                                                                                                                                 |
|           | <p style="text-align: right;">In paid employment <input type="checkbox"/> 1</p> <p>Doing unpaid work for a business that he owns or that a relative owns <input type="checkbox"/> 2</p> <p style="text-align: center;">Waiting to take up paid work already obtained <input type="checkbox"/> 3</p> <p style="text-align: center;">On a Government scheme for employment training <input type="checkbox"/> 4</p> <p style="text-align: center;">Looking for paid work on a Government training scheme <input type="checkbox"/> 5</p> <p>Intending to look for work but prevented by temporary sickness or illness <input type="checkbox"/> 6</p> <p style="text-align: center;">Permanently unable to work because of long-term sickness or disability <input type="checkbox"/> 7</p> <p style="text-align: center;">At college or university full time <input type="checkbox"/> 8</p> <p style="text-align: center;">At college or university part time <input type="checkbox"/> 9</p> <p style="text-align: center;">In full time secondary education (e.g. attending high school) <input type="checkbox"/> 10</p> <p style="text-align: center;">Retired from paid work <input type="checkbox"/> 11</p> <p style="text-align: center;">Looking after home or family <input type="checkbox"/> 12</p> <p style="text-align: center;">Providing full time care for an ill or disabled friend or relative <input type="checkbox"/> 13</p> <p style="text-align: center;">Doing something else (please <b>write in</b>) <input type="checkbox"/> 14</p> <p> _____</p> <p>_____</p> |

## Your childhood

Pregnancy is often a time when women reflect upon their own childhood and their relationship with their parents. We would now like to ask you some questions about what your childhood was like.

**85** Looking back would you say that your childhood was happy?

(Please tick **one** box per line)

| When you were     | Very happy                            | Quite happy                           | Not really happy                      | Quite unhappy                         | Very unhappy                          | Can't remember                        |
|-------------------|---------------------------------------|---------------------------------------|---------------------------------------|---------------------------------------|---------------------------------------|---------------------------------------|
| 0 – 5 years old   | <input type="checkbox"/> 1            | <input type="checkbox"/> 2            | <input type="checkbox"/> 3            | <input type="checkbox"/> 4            | <input type="checkbox"/> 5            | <input type="checkbox"/> 6            |
| 6 – 11 years old  | <input checked="" type="checkbox"/> 1 | <input checked="" type="checkbox"/> 2 | <input checked="" type="checkbox"/> 3 | <input checked="" type="checkbox"/> 4 | <input checked="" type="checkbox"/> 5 | <input checked="" type="checkbox"/> 6 |
| 12 – 15 years old | <input type="checkbox"/> 1            | <input type="checkbox"/> 2            | <input type="checkbox"/> 3            | <input type="checkbox"/> 4            | <input type="checkbox"/> 5            | <input type="checkbox"/> 6            |

**86** Did your parents divorce or separate before your 18<sup>th</sup> birthday?

(Please tick **one** box only)

Yes  1 **Go to Question 86**

No  2 **Go to Question 88**

**87** How old were you when your parents divorced or separated?

(Please **write in**)

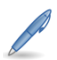

\_\_\_\_\_ Years old

**88** Who did you mainly live with after this?

(Please tick **one** box only)

Mum  1

Dad  2

Sometimes Mum, sometimes Dad  3

Someone else (please **write in**)  4



**89** **When I was growing up...**  
(Please tick **one box per line**)

|                                                                                            | Never true                            | Rarely true                           | Sometimes true                        | Often true                            | Very often true                       |
|--------------------------------------------------------------------------------------------|---------------------------------------|---------------------------------------|---------------------------------------|---------------------------------------|---------------------------------------|
| I didn't have enough to eat                                                                | <input type="checkbox"/> 1            | <input type="checkbox"/> 2            | <input type="checkbox"/> 3            | <input type="checkbox"/> 4            | <input type="checkbox"/> 5            |
| I knew that there was someone to take care of me and protect me                            | <input checked="" type="checkbox"/> 1 | <input checked="" type="checkbox"/> 2 | <input checked="" type="checkbox"/> 3 | <input checked="" type="checkbox"/> 4 | <input checked="" type="checkbox"/> 5 |
| people in my family called me things like 'stupid', 'lazy' or 'ugly'                       | <input type="checkbox"/> 1            | <input type="checkbox"/> 2            | <input type="checkbox"/> 3            | <input type="checkbox"/> 4            | <input type="checkbox"/> 5            |
| my parents were too drunk or high to take care of the family                               | <input checked="" type="checkbox"/> 1 | <input checked="" type="checkbox"/> 2 | <input checked="" type="checkbox"/> 3 | <input checked="" type="checkbox"/> 4 | <input checked="" type="checkbox"/> 5 |
| there was someone in my family who helped me feel that I was important or special          | <input type="checkbox"/> 1            | <input type="checkbox"/> 2            | <input type="checkbox"/> 3            | <input type="checkbox"/> 4            | <input type="checkbox"/> 5            |
| I had to wear dirty clothes                                                                | <input checked="" type="checkbox"/> 1 | <input checked="" type="checkbox"/> 2 | <input checked="" type="checkbox"/> 3 | <input checked="" type="checkbox"/> 4 | <input checked="" type="checkbox"/> 5 |
| I felt loved                                                                               | <input type="checkbox"/> 1            | <input type="checkbox"/> 2            | <input type="checkbox"/> 3            | <input type="checkbox"/> 4            | <input type="checkbox"/> 5            |
| I thought that my parents wished I had never been born                                     | <input checked="" type="checkbox"/> 1 | <input checked="" type="checkbox"/> 2 | <input checked="" type="checkbox"/> 3 | <input checked="" type="checkbox"/> 4 | <input checked="" type="checkbox"/> 5 |
| I got hit so hard by someone in my family that I had to see a doctor or go to the hospital | <input type="checkbox"/> 1            | <input type="checkbox"/> 2            | <input type="checkbox"/> 3            | <input type="checkbox"/> 4            | <input type="checkbox"/> 5            |
| there was nothing I wanted to change about my family                                       | <input checked="" type="checkbox"/> 1 | <input checked="" type="checkbox"/> 2 | <input checked="" type="checkbox"/> 3 | <input checked="" type="checkbox"/> 4 | <input checked="" type="checkbox"/> 5 |
| people in my family hit me so hard that it left me with bruises or marks                   | <input type="checkbox"/> 1            | <input type="checkbox"/> 2            | <input type="checkbox"/> 3            | <input type="checkbox"/> 4            | <input type="checkbox"/> 5            |
| I was punished with a belt, a board, a cord or some other hard object                      | <input checked="" type="checkbox"/> 1 | <input checked="" type="checkbox"/> 2 | <input checked="" type="checkbox"/> 3 | <input checked="" type="checkbox"/> 4 | <input checked="" type="checkbox"/> 5 |
| people in my family looked out for each other                                              | <input type="checkbox"/> 1            | <input type="checkbox"/> 2            | <input type="checkbox"/> 3            | <input type="checkbox"/> 4            | <input type="checkbox"/> 5            |
| people in my family said hurtful or insulting things to me                                 | <input checked="" type="checkbox"/> 1 | <input checked="" type="checkbox"/> 2 | <input checked="" type="checkbox"/> 3 | <input checked="" type="checkbox"/> 4 | <input checked="" type="checkbox"/> 5 |

|                                                                                                 | Never true                 | Rarely true                | Sometimes true             | Often true                 | Very often true            |
|-------------------------------------------------------------------------------------------------|----------------------------|----------------------------|----------------------------|----------------------------|----------------------------|
| I believe that I was physically abused                                                          | <input type="checkbox"/> 1 | <input type="checkbox"/> 2 | <input type="checkbox"/> 3 | <input type="checkbox"/> 4 | <input type="checkbox"/> 5 |
| I had the perfect childhood                                                                     | <input type="checkbox"/> 1 | <input type="checkbox"/> 2 | <input type="checkbox"/> 3 | <input type="checkbox"/> 4 | <input type="checkbox"/> 5 |
| I got hit or beaten so badly that it was noticed by someone like a teacher, neighbour or doctor | <input type="checkbox"/> 1 | <input type="checkbox"/> 2 | <input type="checkbox"/> 3 | <input type="checkbox"/> 4 | <input type="checkbox"/> 5 |
| I felt that someone in my family hated me                                                       | <input type="checkbox"/> 1 | <input type="checkbox"/> 2 | <input type="checkbox"/> 3 | <input type="checkbox"/> 4 | <input type="checkbox"/> 5 |
| people in my family felt close to each other                                                    | <input type="checkbox"/> 1 | <input type="checkbox"/> 2 | <input type="checkbox"/> 3 | <input type="checkbox"/> 4 | <input type="checkbox"/> 5 |
| someone tried to touch me in a sexual way or tried to make me touch them                        | <input type="checkbox"/> 1 | <input type="checkbox"/> 2 | <input type="checkbox"/> 3 | <input type="checkbox"/> 4 | <input type="checkbox"/> 5 |
| someone threatened to hurt me or tell lies about me unless I did something sexual with them     | <input type="checkbox"/> 1 | <input type="checkbox"/> 2 | <input type="checkbox"/> 3 | <input type="checkbox"/> 4 | <input type="checkbox"/> 5 |
| I had the best family in the world                                                              | <input type="checkbox"/> 1 | <input type="checkbox"/> 2 | <input type="checkbox"/> 3 | <input type="checkbox"/> 4 | <input type="checkbox"/> 5 |
| someone tried to make me do sexual things or watch sexual things                                | <input type="checkbox"/> 1 | <input type="checkbox"/> 2 | <input type="checkbox"/> 3 | <input type="checkbox"/> 4 | <input type="checkbox"/> 5 |
| someone molested me                                                                             | <input type="checkbox"/> 1 | <input type="checkbox"/> 2 | <input type="checkbox"/> 3 | <input type="checkbox"/> 4 | <input type="checkbox"/> 5 |
| I believe that I was emotionally abused                                                         | <input type="checkbox"/> 1 | <input type="checkbox"/> 2 | <input type="checkbox"/> 3 | <input type="checkbox"/> 4 | <input type="checkbox"/> 5 |
| there was someone to take me to the doctor if I needed it                                       | <input type="checkbox"/> 1 | <input type="checkbox"/> 2 | <input type="checkbox"/> 3 | <input type="checkbox"/> 4 | <input type="checkbox"/> 5 |
| I believe that I was sexually abused                                                            | <input type="checkbox"/> 1 | <input type="checkbox"/> 2 | <input type="checkbox"/> 3 | <input type="checkbox"/> 4 | <input type="checkbox"/> 5 |
| my family was a source of strength and support                                                  | <input type="checkbox"/> 1 | <input type="checkbox"/> 2 | <input type="checkbox"/> 3 | <input type="checkbox"/> 4 | <input type="checkbox"/> 5 |

|    |                                                                      |                                       |                                       |                                       |
|----|----------------------------------------------------------------------|---------------------------------------|---------------------------------------|---------------------------------------|
| 90 | <b>Did any of the following happen to you during childhood?</b>      |                                       |                                       |                                       |
|    | (Please tick <b>one box per line</b> )                               |                                       |                                       |                                       |
|    |                                                                      | <b>Yes</b>                            | <b>No</b>                             | <b>Not sure</b>                       |
|    | I was legally adopted                                                | <input type="checkbox"/> 1            | <input type="checkbox"/> 2            | <input type="checkbox"/> 3            |
|    | I lived in a children's home or residential unit/school              | <input checked="" type="checkbox"/> 1 | <input checked="" type="checkbox"/> 2 | <input checked="" type="checkbox"/> 3 |
|    | I lived with a foster carer                                          | <input type="checkbox"/> 1            | <input type="checkbox"/> 2            | <input type="checkbox"/> 3            |
|    | I lived in secure accommodation or a young person's institute/prison | <input checked="" type="checkbox"/> 1 | <input checked="" type="checkbox"/> 2 | <input checked="" type="checkbox"/> 3 |
|    | I lived with a relative (other than for holidays or short visits)    | <input type="checkbox"/> 1            | <input type="checkbox"/> 2            | <input type="checkbox"/> 3            |

## Parenting

|    |                                                                                                                                                                                                                                                              |                                       |                                       |                                       |                                       |                                       |
|----|--------------------------------------------------------------------------------------------------------------------------------------------------------------------------------------------------------------------------------------------------------------|---------------------------------------|---------------------------------------|---------------------------------------|---------------------------------------|---------------------------------------|
| 91 | <b>The following questions are about things that sometimes cause problems for parents in the first few months after their baby is born. How well do you think you would cope with the problems listed in the first three months after your baby is born?</b> |                                       |                                       |                                       |                                       |                                       |
|    | (Please tick <b>one box per line</b> )                                                                                                                                                                                                                       |                                       |                                       |                                       |                                       |                                       |
|    |                                                                                                                                                                                                                                                              | <b>Very well</b>                      | <b>Quite well</b>                     | <b>Not well</b>                       | <b>Not well at all</b>                | <b>Does not apply</b>                 |
|    | Managing the relationship between my baby and his/her brothers or sisters                                                                                                                                                                                    | <input type="checkbox"/> 1            | <input type="checkbox"/> 2            | <input type="checkbox"/> 3            | <input type="checkbox"/> 4            | <input type="checkbox"/> 5            |
|    | My baby suffering from wind or colic                                                                                                                                                                                                                         | <input checked="" type="checkbox"/> 1 | <input checked="" type="checkbox"/> 2 | <input checked="" type="checkbox"/> 3 | <input checked="" type="checkbox"/> 4 | <input checked="" type="checkbox"/> 5 |
|    | My baby's sleeping pattern                                                                                                                                                                                                                                   | <input type="checkbox"/> 1            | <input type="checkbox"/> 2            | <input type="checkbox"/> 3            | <input type="checkbox"/> 4            | <input type="checkbox"/> 5            |
|    | Getting my baby to feed                                                                                                                                                                                                                                      | <input checked="" type="checkbox"/> 1 | <input checked="" type="checkbox"/> 2 | <input checked="" type="checkbox"/> 3 | <input checked="" type="checkbox"/> 4 | <input checked="" type="checkbox"/> 5 |
|    | My baby having health problems                                                                                                                                                                                                                               | <input type="checkbox"/> 1            | <input type="checkbox"/> 2            | <input type="checkbox"/> 3            | <input type="checkbox"/> 4            | <input type="checkbox"/> 5            |
|    | Being able to afford all the baby clothes and equipment you need for your baby                                                                                                                                                                               | <input checked="" type="checkbox"/> 1 | <input checked="" type="checkbox"/> 2 | <input checked="" type="checkbox"/> 3 | <input checked="" type="checkbox"/> 4 | <input checked="" type="checkbox"/> 5 |
|    | Managing the house and other domestic responsibilities (e.g. cooking, cleaning, shopping)                                                                                                                                                                    | <input type="checkbox"/> 1            | <input type="checkbox"/> 2            | <input type="checkbox"/> 3            | <input type="checkbox"/> 4            | <input type="checkbox"/> 5            |

| 92 Please say how much you agree or disagree with each statement.<br>(Please tick <b>one box per line</b> )                                     |                                       |                                       |                                       |                                       |                                       |
|-------------------------------------------------------------------------------------------------------------------------------------------------|---------------------------------------|---------------------------------------|---------------------------------------|---------------------------------------|---------------------------------------|
|                                                                                                                                                 | Strongly agree                        | Agree                                 | Neither agree nor disagree            | Disagree                              | Strongly disagree                     |
| Nobody can teach you how to be a good parent, you just have to learn for yourself                                                               | <input type="checkbox"/> 1            | <input type="checkbox"/> 2            | <input type="checkbox"/> 3            | <input type="checkbox"/> 4            | <input type="checkbox"/> 5            |
| If you ask for help or advice on parenting from professionals like doctors or social workers they will start interfering or trying to take over | <input checked="" type="checkbox"/> 1 | <input checked="" type="checkbox"/> 2 | <input checked="" type="checkbox"/> 3 | <input checked="" type="checkbox"/> 4 | <input checked="" type="checkbox"/> 5 |
| It's difficult to ask people for help or advice about parenting unless you know them really well                                                | <input type="checkbox"/> 1            | <input type="checkbox"/> 2            | <input type="checkbox"/> 3            | <input type="checkbox"/> 4            | <input type="checkbox"/> 5            |
| It's hard to know who to ask for help or advice about being a parent                                                                            | <input checked="" type="checkbox"/> 1 | <input checked="" type="checkbox"/> 2 | <input checked="" type="checkbox"/> 3 | <input checked="" type="checkbox"/> 4 | <input checked="" type="checkbox"/> 5 |

| 93 How much experience do you have spending time with or looking after very young children?<br>(Please tick <b>one box only</b> ) |                            |                            |                            |  |
|-----------------------------------------------------------------------------------------------------------------------------------|----------------------------|----------------------------|----------------------------|--|
| A lot                                                                                                                             | Quite a lot                | Not very much              | None at all                |  |
| <input type="checkbox"/> 1                                                                                                        | <input type="checkbox"/> 2 | <input type="checkbox"/> 3 | <input type="checkbox"/> 4 |  |

## **END OF QUESTIONNAIRE**

**THANK YOU VERY MUCH FOR TAKING PART AND  
ANSWERING THE QUESTIONS**

**If you have any thoughts on this questionnaire or feedback for the THRIVE team that may help us inform future aspects of this research, please feel free to leave comments here. You can also email your comments to [THRIVE@sphsu.mrc.ac.uk](mailto:THRIVE@sphsu.mrc.ac.uk)**
